# Supplementary material
Source: PubMed Central journal article supplement (PMC4240975)
Supplement: NIHMS642241-supplement-Supplemental_data.pdf [file NIHMS642241-supplement-Supplemental_data.pdf]

## Supplementary Appendix

This appendix has been supplied by the authors to provide readers with additional information regarding their work.

### Supplement to:

#### **A three-gene expression signature model for risk stratification of patients with neuroblastoma.**

Garcia I, Mayol G, Ríos J, Domenech G, Cheung NK, Oberthuer A, Fischer M, Maris JM, Brodeur GM, Hero B, Rodríguez E, Suñol M, Galvan P, de Torres C, Mora J and Lavarino C.

### Methods:

1. **Supplementary Table 2.** TaqMan Gene Expression Assays for gene expression analysis by quantitative real-time PCR. pg.2

### Results:

1. **Supplementary Table 3.** Univariable Cox regression models of the expression of 11 genes with OS and EFS as a dependent variable. pg.3
2. **Supplementary Table 4.** Comparison of principal component coefficient scores of the developed models. pg.3
3. **Supplementary Figure Legends** pg. 4
4. **Supplementary Figure 1.** Kaplan-Meier and log-rank estimates defined by the ( $Y_{36}$ ) model in 36, 60, 96 and Set 1 primary NB tumors. pg.5
5. **Supplementary Figure 2 to 10.** Kaplan-Meier estimates and log-rank test of NB subgroups derived from Set 3. pg.6-14
6. **Supplementary Figure 11.** Kaplan-Meier and long-rank estimates according to the three-gene microarray prediction models ( $Y_{Set2}$  and  $Y_{Set3}$ ) pg.15

**Supplementary Table 2.** TaqMan Gene Expression Assays for gene expression analysis by quantitative real-time PCR.

| <b>Gene symbol</b>    | <b>Gene Name</b>                                                      | <b>TaqMan Assay ID</b> |
|-----------------------|-----------------------------------------------------------------------|------------------------|
| <b>Model Gene</b>     |                                                                       |                        |
| <i>CHD5</i>           | Chromodomain DNA binding helicase, protein 5                          | Hs00395930_m1          |
| <i>PAFAH1B1</i>       | Platelet-activating factor acetylhydrolase, isoform 1B, alpha subunit | Hs00181182_m1          |
| <i>NME1</i>           | Non-metastatic cell 1, protein (NM23A) expressed in                   | Hs00264824_m1          |
| <b>Reference Gene</b> |                                                                       |                        |
| <i>TBP</i>            | TATA box-binding protein                                              | Hs00427620_m1          |
| <i>HPRT1</i>          | Hypoxanthine guanine phosphoribosyltransferase 1                      | Hs01003267_m1          |
| <i>SDHA</i>           | succinate dehydrogenase complex, subunit A                            | Hs00417200_m1          |

**Supplementary Table 3.** Univariable Cox regression models of the expression of 11 genes with OS and EFS as a dependent variable.

| Gene            | Localization   | Overall survival         |              | Event free survival      |              |
|-----------------|----------------|--------------------------|--------------|--------------------------|--------------|
|                 |                | Hazard Ratio             |              | Hazard Ratio             |              |
|                 |                | 95%CI                    | P-value      | 95%CI                    | P-value      |
| <b>NME1</b>     | <b>17q21.3</b> | <b>2.09 (1.26; 3.49)</b> | <b>0.005</b> | <b>1.60 (1.06; 2.42)</b> | <b>0.026</b> |
| FLOT2           | 17q11.2        | 0.77 (0.38; 1.59)        | 0.483        | 1.04 (0.62; 1.75)        | 0.873        |
| POLR2A          | 17p13.1        | 0.54 (0.20; 1.46)        | 0.225        | 0.53 (0.23; 1.23)        | 0.142        |
| RERE            | 1p36.23        | 0.52 (0.27; 0.99)        | 0.046        | 0.55 (0.33; 0.91)        | 0.019        |
| RUTBC1          | 17p13.3        | 0.49 (0.21; 1.17)        | 0.108        | 0.65 (0.36; 1.20)        | 0.171        |
| PTPRF           | 1p34           | 0.40 (0.16; 0.96)        | 0.039        | 0.34 (0.16; 0.73)        | 0.006        |
| VAMP2           | 17p13.1        | 0.37 (0.10; 1.42)        | 0.149        | 0.57 (0.25; 1.28)        | 0.171        |
| ARHGEF11        | 1q21           | 0.37 (0.14; 1.01)        | 0.053        | 0.65 (0.32; 1.31)        | 0.229        |
| GNB1            | 1p36.33        | 0.32 (0.12; 0.89)        | 0.029        | 0.46 (0.23; 0.91)        | 0.026        |
| <b>CHD5</b>     | <b>1p36.31</b> | <b>0.17 (0.03; 0.85)</b> | <b>0.031</b> | <b>0.38 (0.15; 0.97)</b> | <b>0.043</b> |
| <b>PAFAH1B1</b> | <b>17p13.3</b> | <b>0.20 (0.07; 0.60)</b> | <b>0.004</b> | <b>0.23 (0.10; 0.52)</b> | <b>0.000</b> |

**Supplementary Table 4.** Comparison of principal component coefficient scores of the developed models.

| Component coefficient scores |            |            |            |
|------------------------------|------------|------------|------------|
| Model                        | $\alpha_1$ | $\alpha_2$ | $\alpha_3$ |
| Y <sub>36</sub>              | 0.418      | 0.430      | -0.374     |
| Y <sub>96</sub>              | 0.480      | 0.462      | -0.347     |
| Y <sub>Set2</sub>            | 0.502      | 0.454      | -0.266     |
| Y <sub>Set3</sub>            | 0.445      | 0.457      | -0.430     |

**Supplementary Figure 1.** Kaplan-Meier analyses with log-rank estimates for OS and EFS according to the ( $Y_{36}$ ) model in the training set of 36 NB cases (Panel A and B) and in the independent set of 60 (Panel C and D). OS and EFS of the complete training set of 96 primary tumors (Panel E and F) and of the validation Set 1 (Panel G and H) classified according to the ( $Y_{96}$ ) model.

**Supplementary Figure 2.** Kaplan-Meier analyses with log-rank estimates for OS and EFS are shown as defined by the ( $Y_{96}$ ) model (Panel A and B), INRG (Panel C and D), GPOH NB2004 (Panel E and F), COG (Panel G and H) and JANB (Panel I and J) risk stratification systems for NB patients <18 months from Set 3 cohort.

**Supplementary Figure 3.** Kaplan-Meier analyses with log-rank estimates for OS and EFS are shown as defined by the ( $Y_{96}$ ) model (Panel A and B), INRG (Panel C and D), GPOH NB2004 (Panel E and F), COG (Panel G and H) and JANB (Panel I and J) risk stratification systems for NB patients age > 18 months from Set 3 cohort.

**Supplementary Figure 4.** Kaplan-Meier analyses with log-rank estimates for OS and EFS are shown as defined by the ( $Y_{96}$ ) model (Panel A and B), INRG (Panel C and D), GPOH NB2004 (Panel E and F), COG (Panel G and H) and JANB (Panel I and J) risk stratification systems for all NB patients stage 1 to 3 *MYCN* non-amplified from Set 3.

**Supplementary Figure 5.** Kaplan-Meier analyses with log-rank estimates for OS and EFS are shown as defined by the ( $Y_{96}$ ) model (Panel A and B), INRG (Panel C and D), GPOH NB2004 (Panel E and F), COG (Panel G and H) and JANB (Panel I and J) risk stratification systems for patients age > 18 months with stage 1 to 3 NB from Set 3 cohort.

**Supplementary Figure 6.** Kaplan-Meier analyses with log-rank estimates for OS and EFS are shown as defined by the ( $Y_{96}$ ) model (Panel A and B), INRG (Panel C and D), GPOH NB2004 (Panel E and F), COG (Panel G and H) and JANB (Panel I and J) risk stratification systems for patients age >18m, stage 1 to 3 *MYCN* non-amplified from Set 3.

**Supplementary Figure 7.** Kaplan-Meier analyses with log-rank estimates for OS and EFS are shown as defined by the ( $Y_{96}$ ) model (Panel A and B), INRG (Panel C and D), GPOH NB2004 (Panel E and F), COG (Panel G and H) and JANB (Panel I and J) risk stratification systems for patients stage 4 from Set 3 cohort. Panels C and D show only 1 graph since all patients with available data for risk stratification according to the INRG criteria, were classified as HR tumors.

**Supplementary Figure 8.** Kaplan-Meier and log-rank estimates of OS and EFS are shown as defined by the ( $Y_{96}$ ) model (Panel A and B), INRG (Panel C and D), GPOH NB2004 (Panel E and F), COG (Panel G and H) and JANB (Panel I and J) risk stratification systems for patients stage 4 *MYCN* non-amplified from Set 3 cohort. Panels C and D show only 1 graph since all patients with available data for risk stratification according to the INRG criteria, were classified as HR tumors.

**Supplementary Figure 9.** Kaplan-Meier and log-rank estimates of OS and EFS as defined by the ( $Y_{96}$ ) model (Panel A and B) in patients >18m stage 4 *MYCN* non-amplified from Set 3 cohort. According to the INRG, GPOH NB2004, COG and JANB criteria all patients were classified as high-risk (data not shown).

**Supplementary Figure 10.** Kaplan-Meier analysis with log-rank estimates of OS and EFS for all *MYCN* amplified NB (stage 1 to 4). According to the INRG, GPOH NB2004, COG and JANB criteria all patients were classified as high-risk (data not shown).

**Supplementary Figure 11.** Kaplan-Meier and long-rank estimates of OS and EFS are shown as defined by the prediction of the models based on the three-gene microarray expression,  $Y_{Set2}$  (Panel A and B) and  $Y_{Set3}$  (Panel C and D).

**SUPPLEMENTARY FIGURE 1**

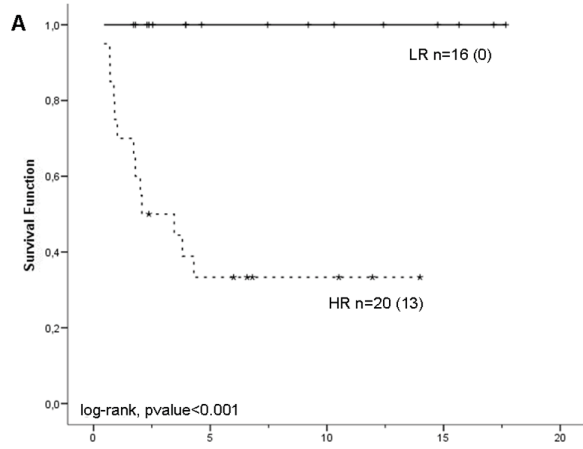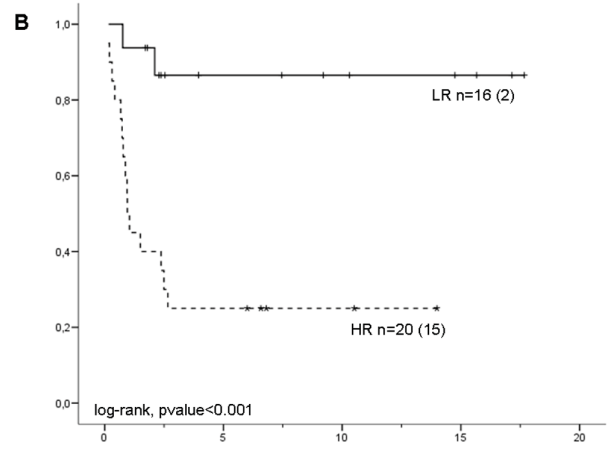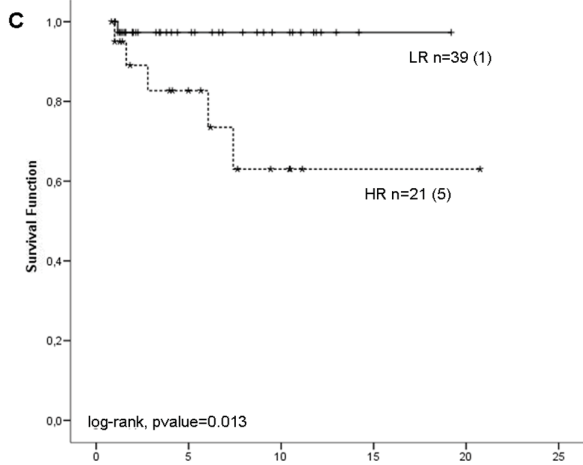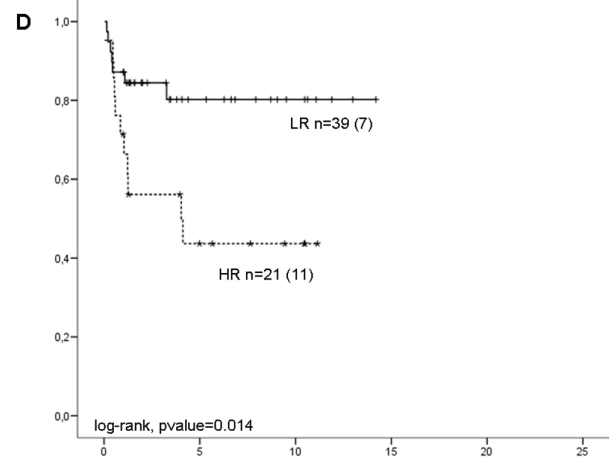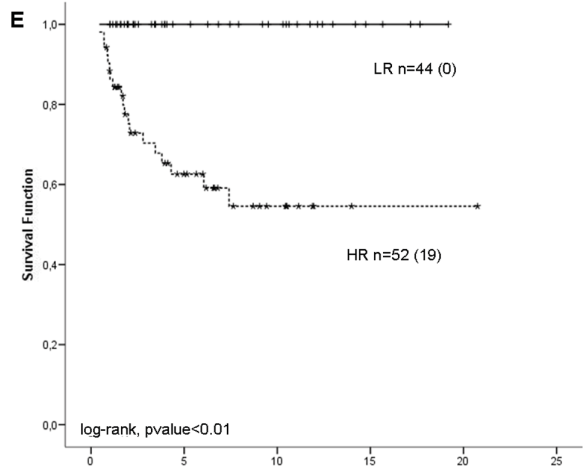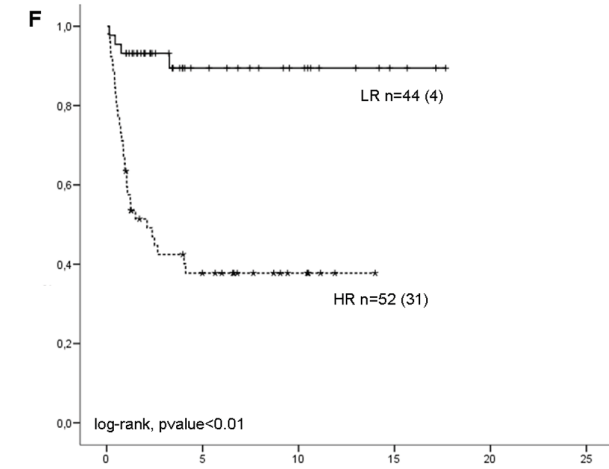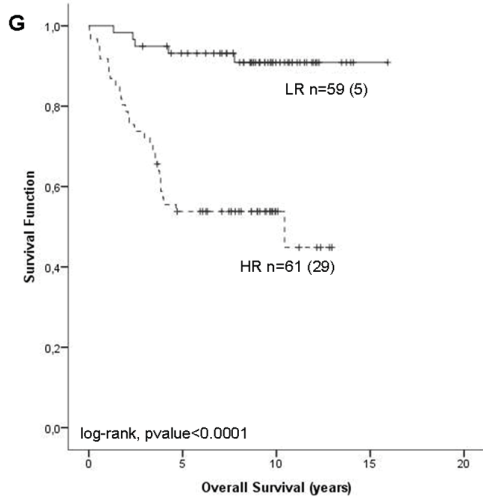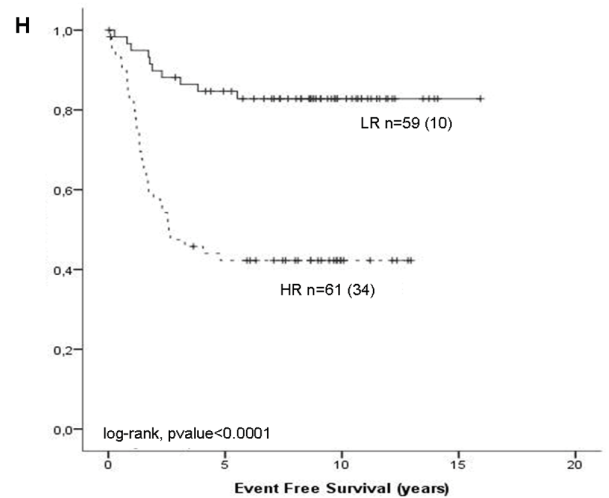

SUPPLEMENTARY FIGURE 2

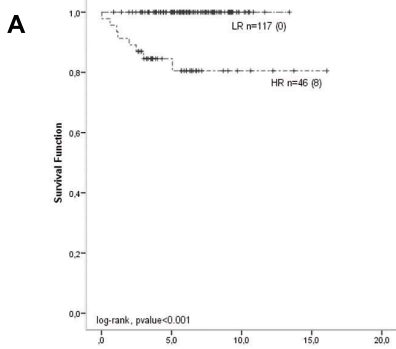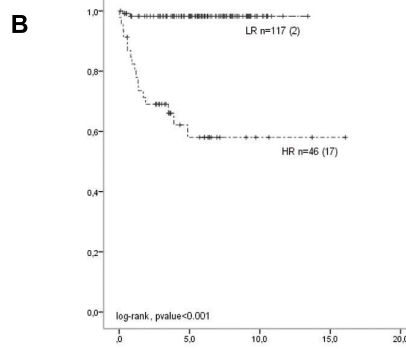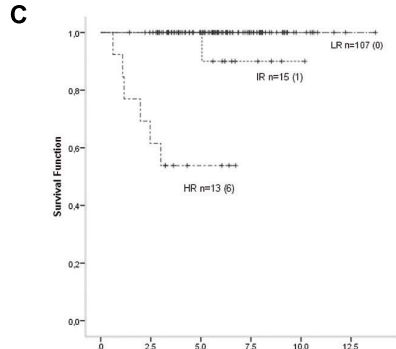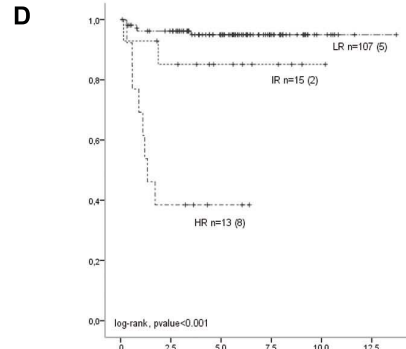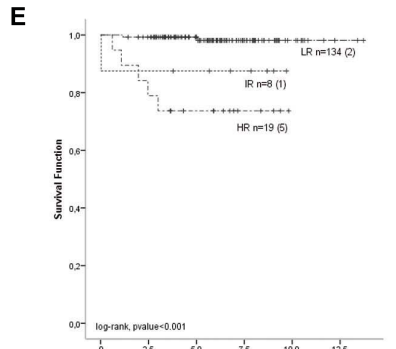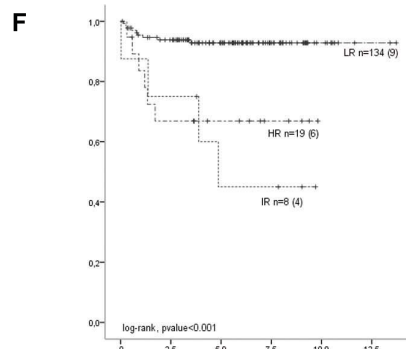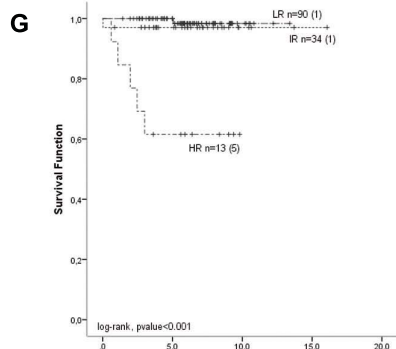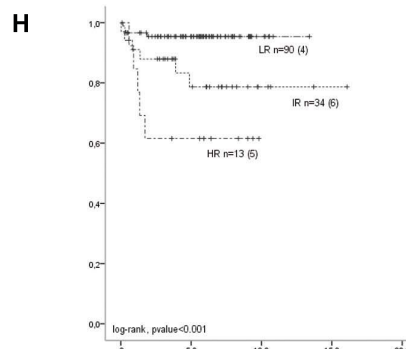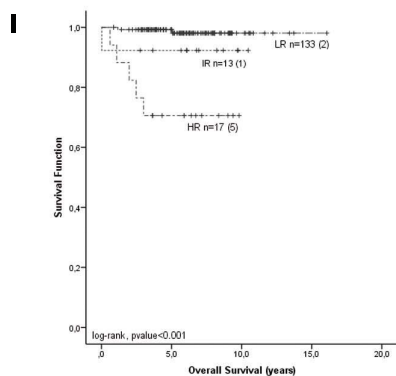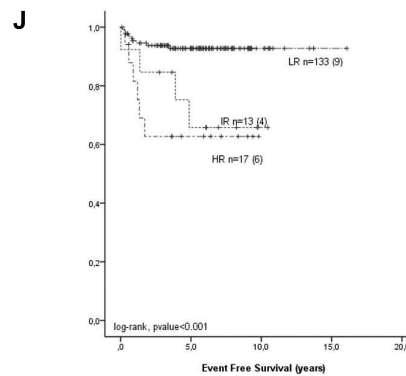

SUPPLEMENTARY FIGURE 3

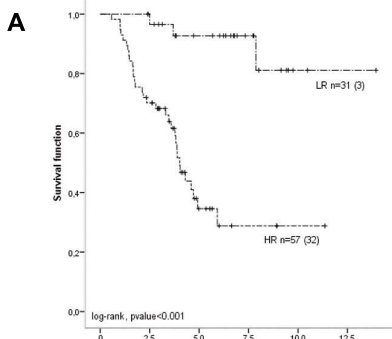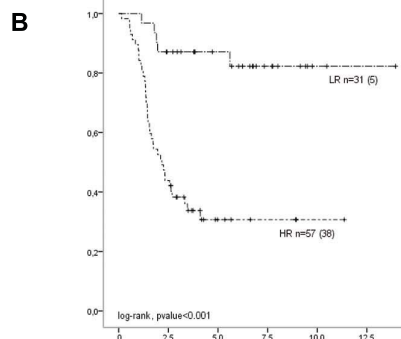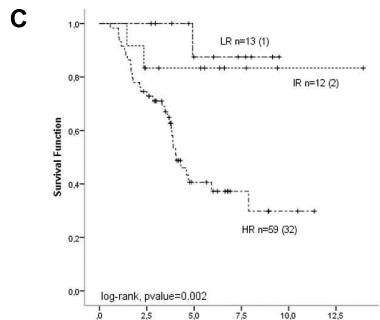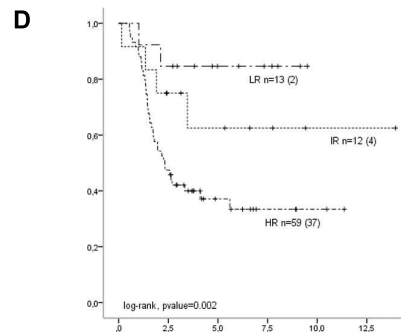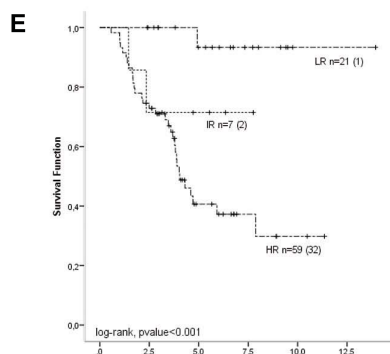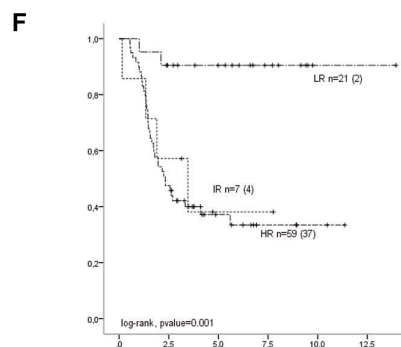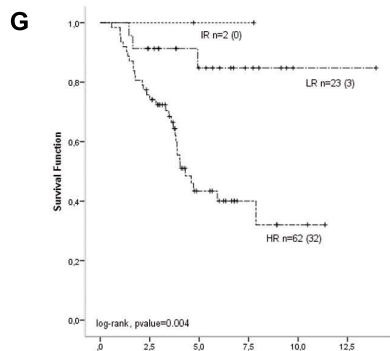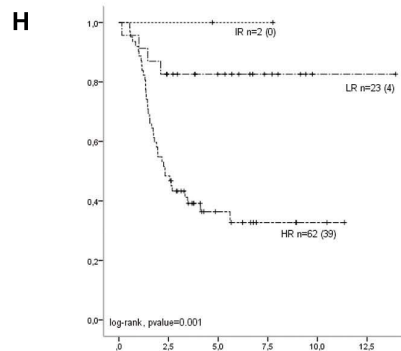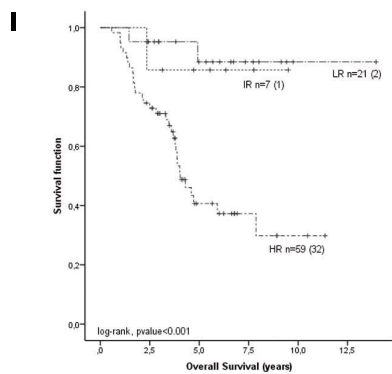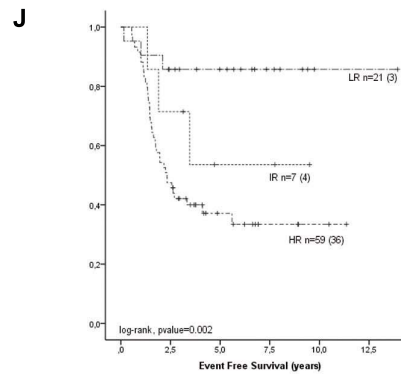

**SUPPLEMENTARY FIGURE 4**

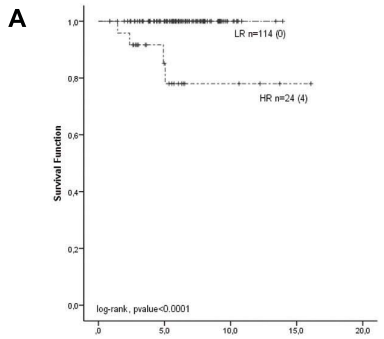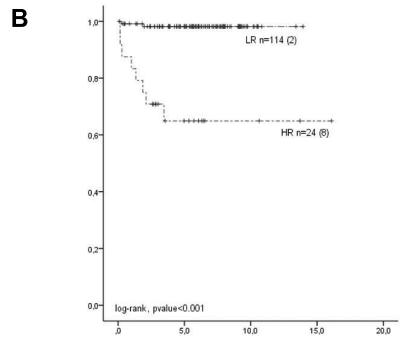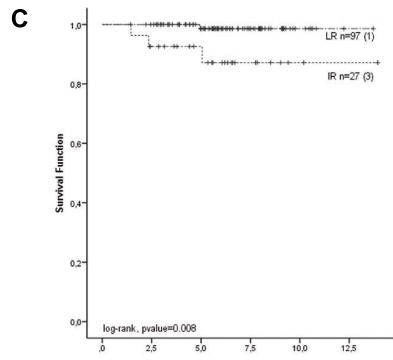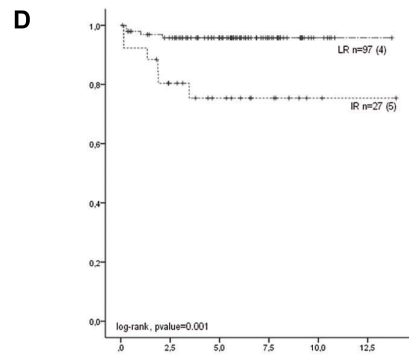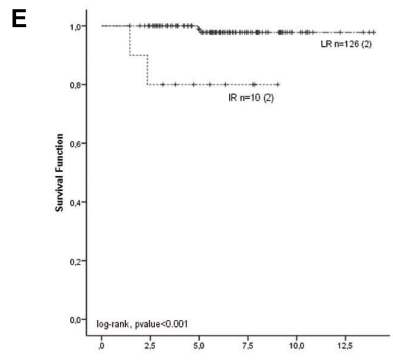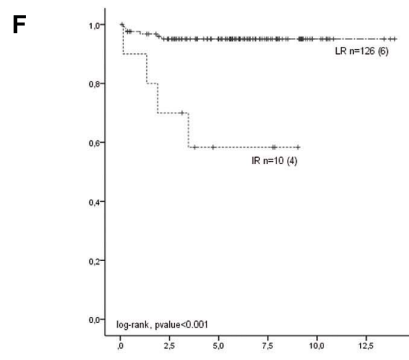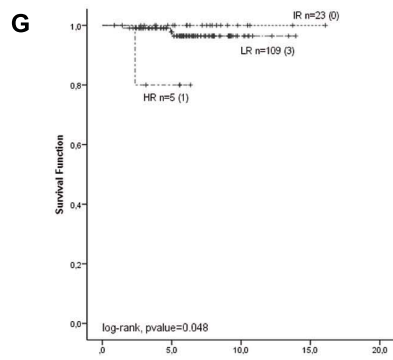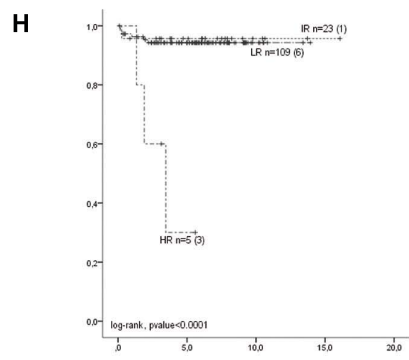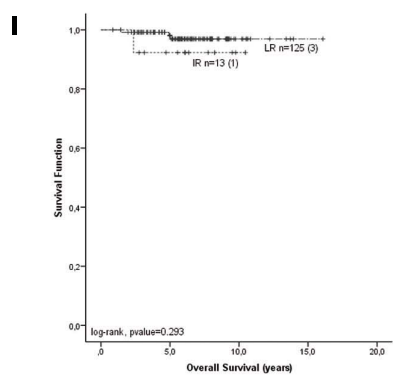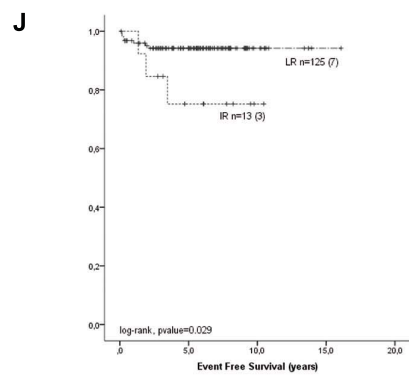



**SUPPLEMENTARY FIGURE 5**

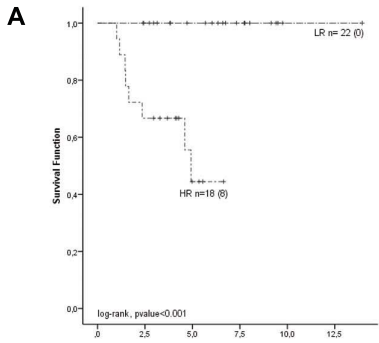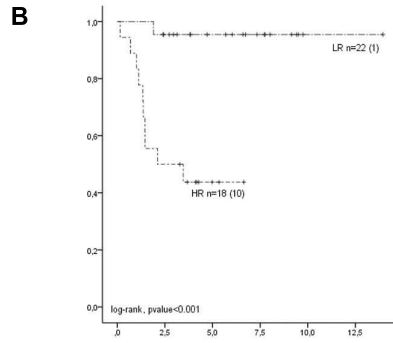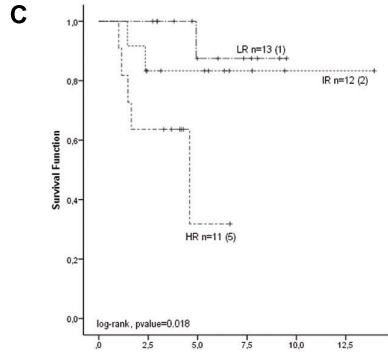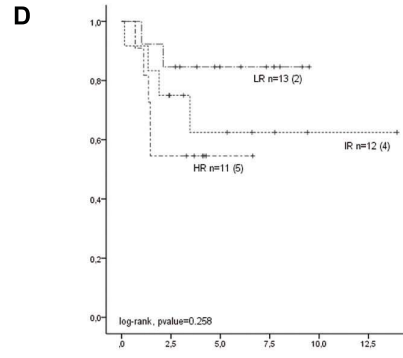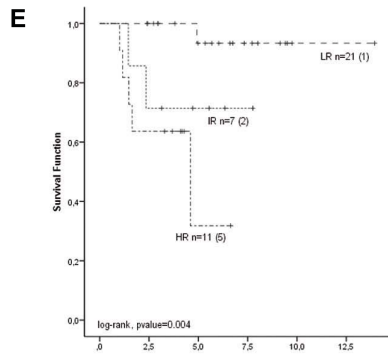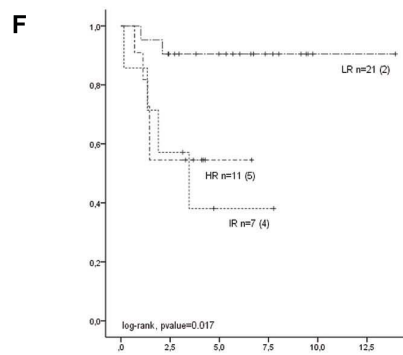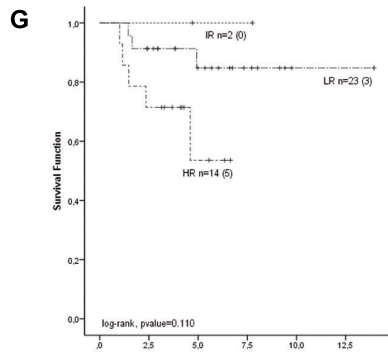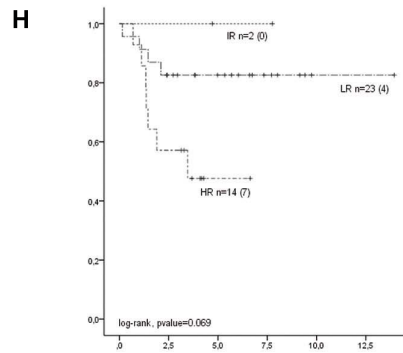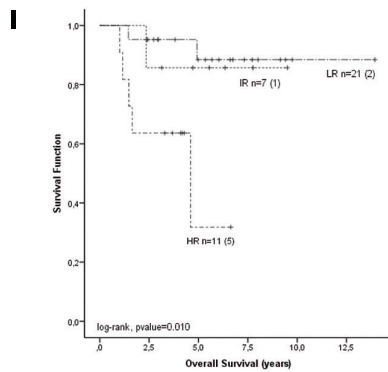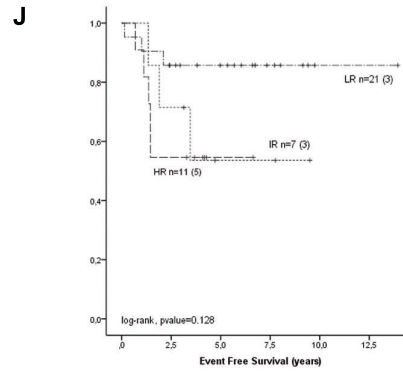

SUPPLEMENTARY FIGURE 6

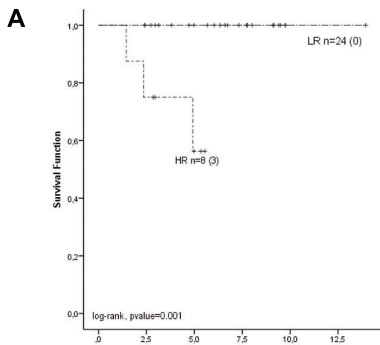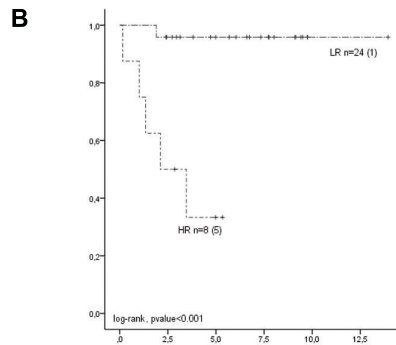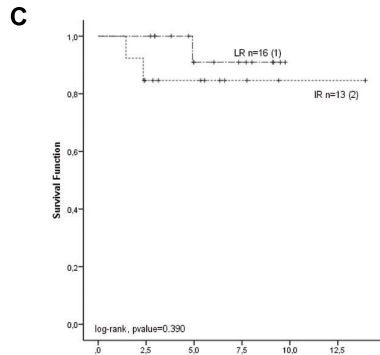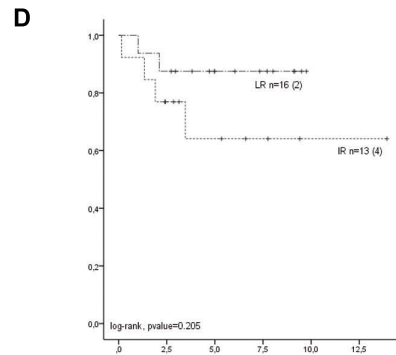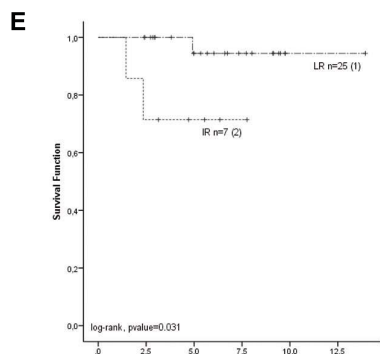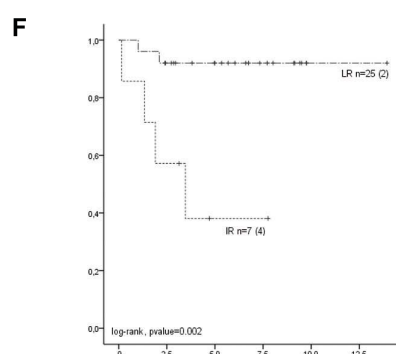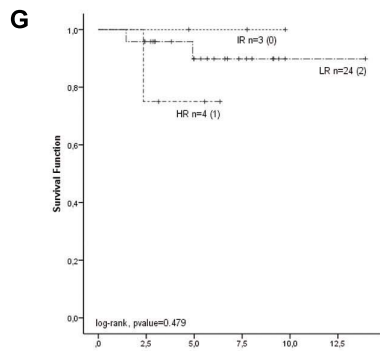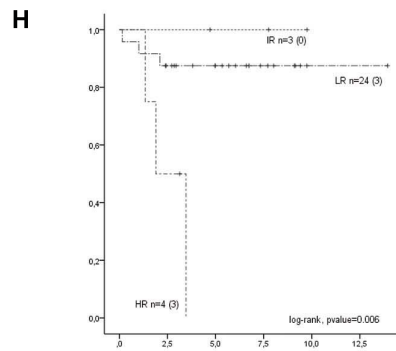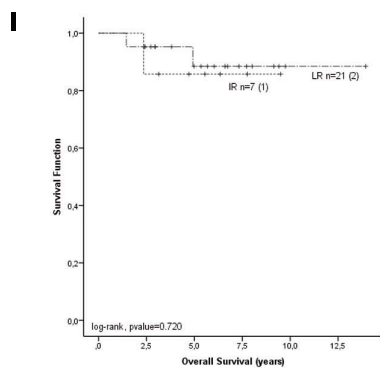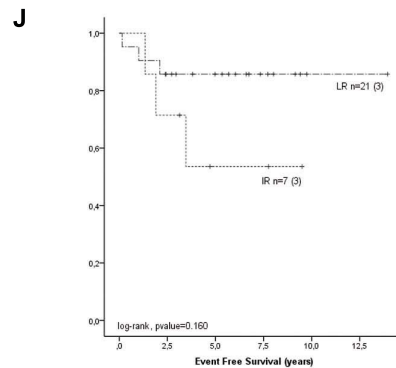

**SUPPLEMENTARY FIGURE 7**

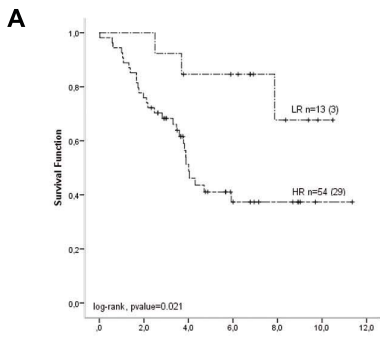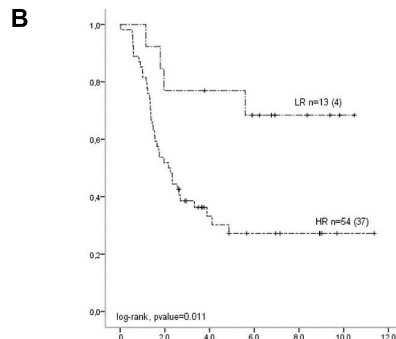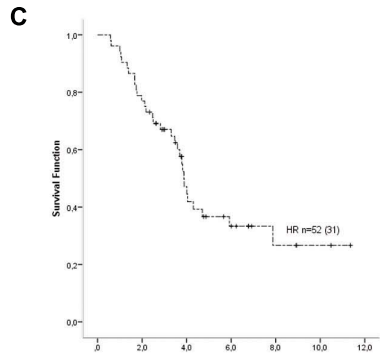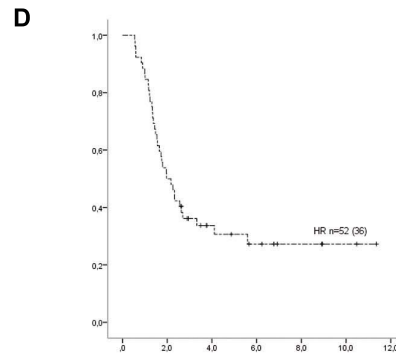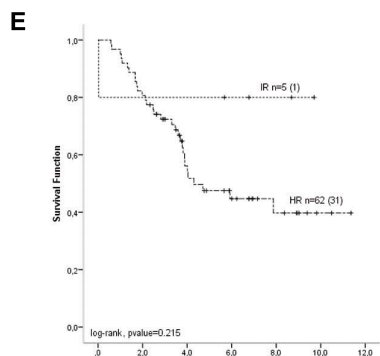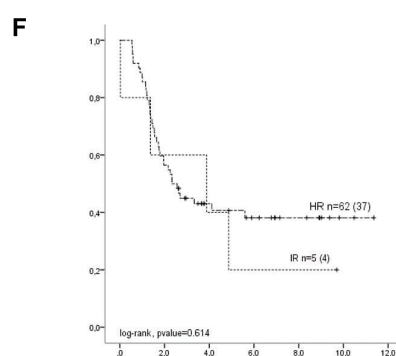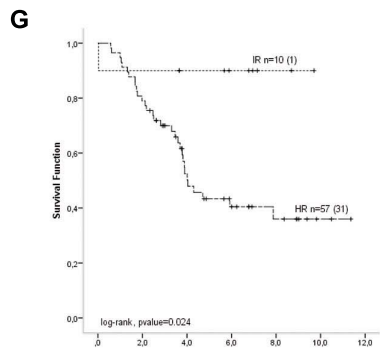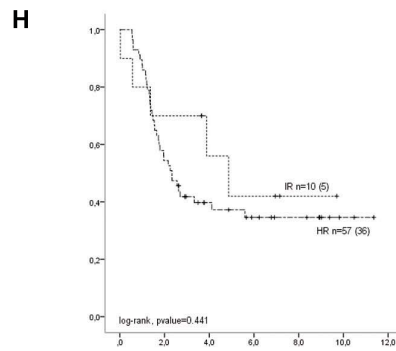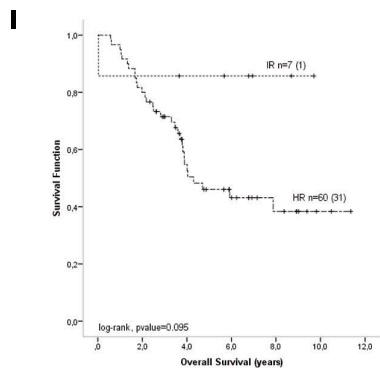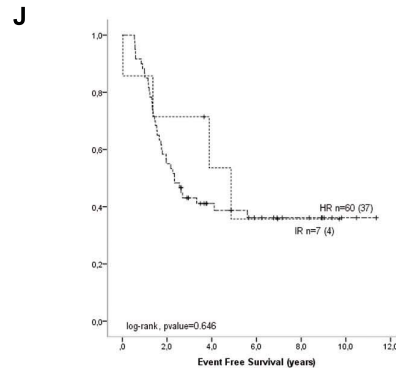

SUPPLEMENTARY FIGURE 8

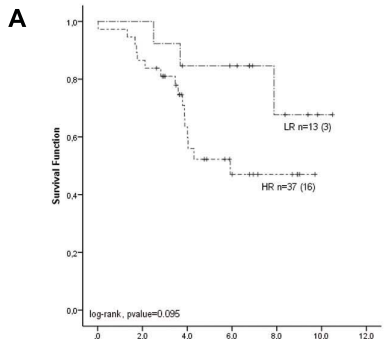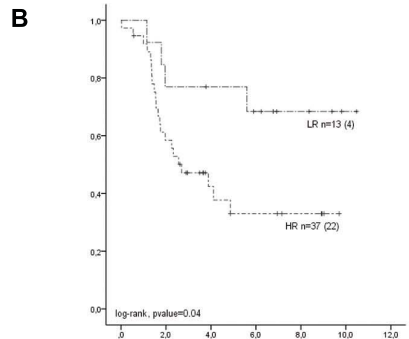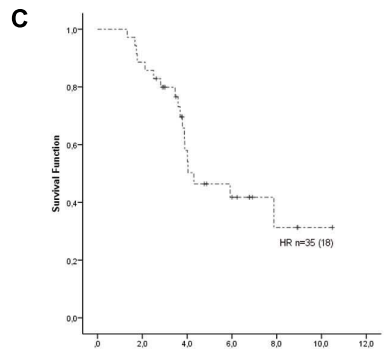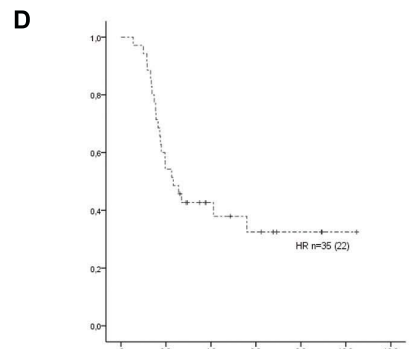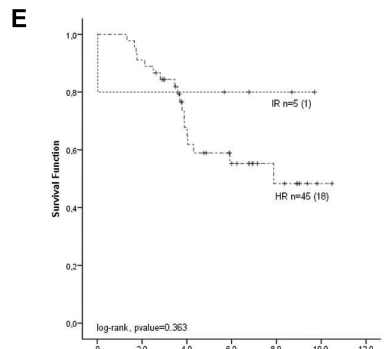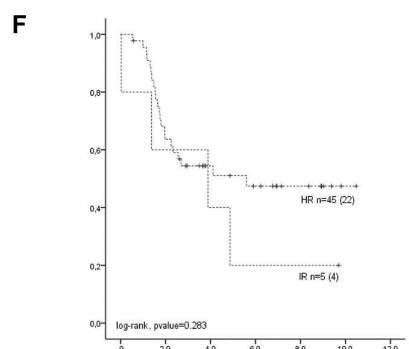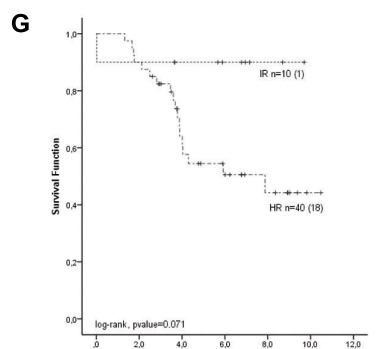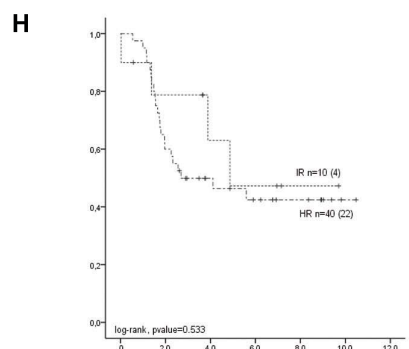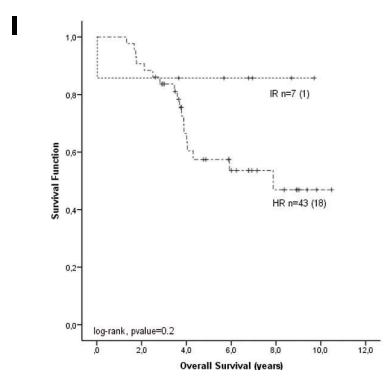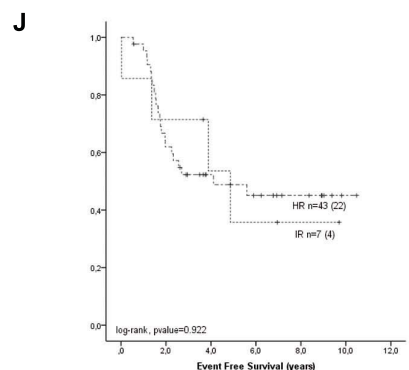

SUPPLEMENTARY FIGURE 9

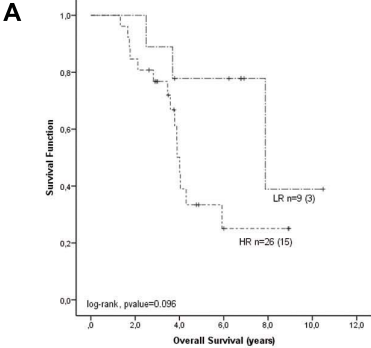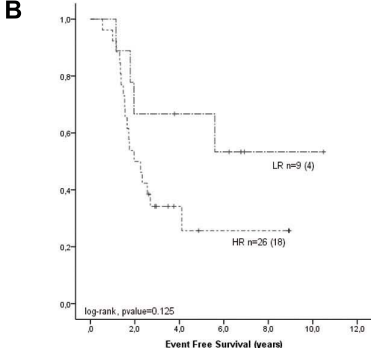

SUPPLEMENTARY FIGURE 10

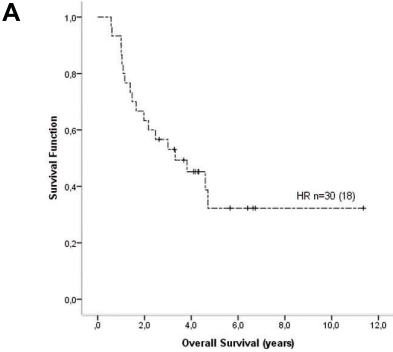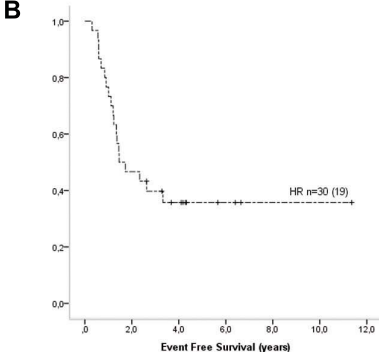

# SUPPLEMENTARY FIGURE 11

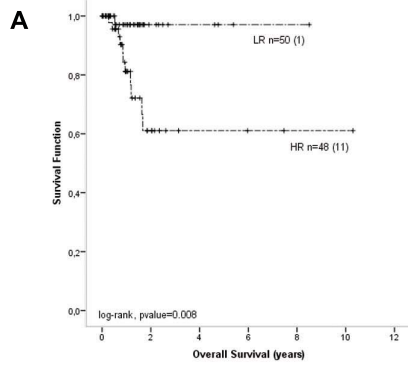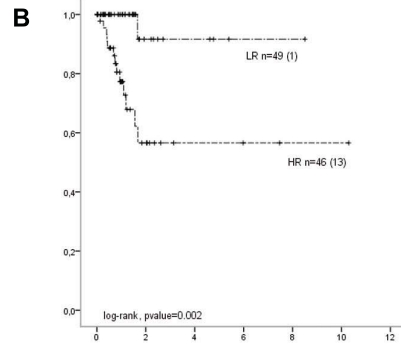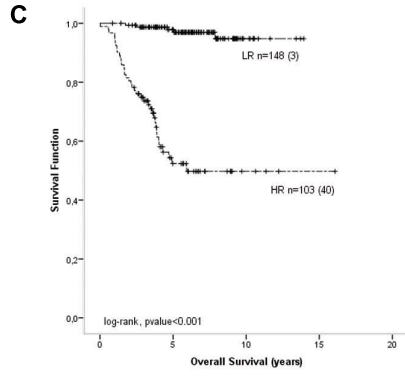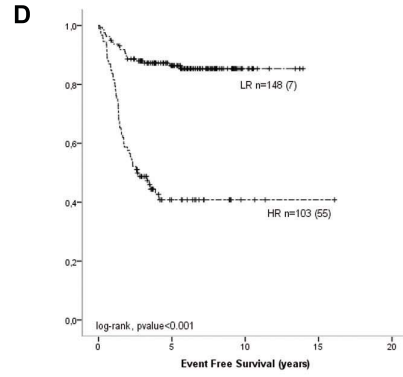

**Supplementary Table 5**

**Validation Set 3. Classification of patients according to the risk classification system of the INRG and of clinical trials of Germany (GPOH NB2004), United States (COG) and Japan (JANB).**

Comparison with the Y96 and YSet3 3-gene signature models.

Age: 0= <18m, 1= >18m; INSS: 0= Stage 1, 2, 3 or 4s, 1= Stage 4; MYCN status: 0= non amplified, 1= amplified; 1p LOH status: 0= normal, 1= LOH; Event: 0= no event, 1= event; Survival Status: 0=alive, 1= dead; n.a.= non available

| Sample ID | Age | INSS | MYCN | 1pLOH | Event | EFS (months) | Survival Status | OS (months) | INRG | GPOH NB2004 | COG | JANB | Y96 | Yset3 | Y96 Value | YSet3 Value |
|-----------|-----|------|------|-------|-------|--------------|-----------------|-------------|------|-------------|-----|------|-----|-------|-----------|-------------|
| Set 3 .1  | 1   | 0    |      | 0     | 0     | 45.50        | 0               | 46.2        | n.a. | n.a.        | LR  | n.a. | LR  | LR    | 0.81      | 0.82        |
| Set 3 .2  | 1   | 1    | 1    | 1     | 1     | 39.33        | 1               | 56.5        | HR   | HR          | HR  | HR   | HR  | HR    | -1.21     | -1.37       |
| Set 3 .3  | 0   | 0    | 0    | 0     | 0     | 90.12        | 0               | 91.4        | LR   | LR          | LR  | LR   | LR  | LR    | 0.38      | 0.45        |
| Set 3 .4  | 0   | 1    | 0    | 0     | 0     | 6.77         | 0               | 70.7        | n.a. | HR          | HR  | HR   | HR  | HR    | -0.24     | -0.24       |
| Set 3 .5  | 0   | 0    | 0    | 0     | 0     | 77.93        | 0               | 79.1        | LR   | LR          | LR  | LR   | LR  | LR    | 0.52      | 0.52        |
| Set 3 .6  | 0   | 0    | 0    | 0     | 0     | 9.63         | 0               | 93.6        | LR   | LR          | LR  | LR   | LR  | LR    | 0.86      | 0.83        |
| Set 3 .7  | 1   | 1    | 0    | 0     | 1     | 23.16        | 0               | 81.4        | HR   | HR          | HR  | HR   | LR  | LR    | 0.26      | 0.23        |
| Set 3 .8  | 0   | 0    | 0    | 0     | 0     | 97.41        | 0               | 98.8        | LR   | LR          | LR  | IR   | LR  | LR    | 1.02      | 1.08        |
| Set 3 .9  | 0   | 0    | 0    | 0     | 0     | 30.62        | 0               | 47.9        | LR   | LR          | IR  | LR   | HR  | HR    | -0.20     | -0.19       |
| Set 3 .10 | 0   | 0    | 0    | 0     | 0     | 52.21        | 0               | 53.0        | IR   | LR          | LR  | LR   | LR  | LR    | 0.76      | 0.75        |
| Set 3 .11 | 1   | 1    | 0    | 1     | 1     | 17.02        | 1               | 20.1        | HR   | HR          | HR  | HR   | HR  | HR    | -0.84     | -0.98       |
| Set 3 .12 | 0   | 1    | 0    | 0     | 0     | 43.24        | 0               | 43.9        | n.a. | HR          | HR  | IR   | HR  | HR    | -0.05     | -0.04       |
| Set 3 .13 | 0   | 0    | 0    | 0     | 0     | 40.18        | 0               | 40.8        | LR   | LR          | LR  | LR   | LR  | LR    | 0.29      | 0.39        |
| Set 3 .14 | 0   | 0    | 0    | 0     | 0     | 66           | 0               | 67.0        | LR   | LR          | LR  | LR   | LR  | LR    | 1.11      | 1.15        |
| Set 3 .15 | 0   | 0    | 0    | 0     | 0     | 74.09        | 0               | 75.2        | LR   | LR          | LR  | LR   | LR  | LR    | 0.08      | 0.07        |
| Set 3 .16 | 1   | 0    | 1    | 1     | 1     | 13.21        | 1               | 13.9        | HR   | HR          | HR  | HR   | HR  | HR    | -0.27     | -0.33       |
| Set 3 .17 | 0   | 0    | 0    | 0     | 0     | 43.7         | 0               | 44.3        | LR   | LR          | LR  | LR   | LR  | LR    | 0.12      | 0.16        |
| Set 3 .18 | 1   | 1    | 1    | 1     | 0     | 66.96        | 0               | 67.9        | HR   | HR          | HR  | HR   | HR  | HR    | -1.46     | -1.61       |
| Set 3 .19 | 0   | 0    | 0    | 0     | 0     | 114.07       | 0               | 115.7       | LR   | LR          | LR  | LR   | LR  | LR    | 0.83      | 0.84        |
| Set 3 .20 | 0   | 0    | 0    | 0     | 0     | 45.08        | 0               | 45.7        | n.a. | LR          | LR  | n.a. | LR  | LR    | 0.13      | 0.03        |
| Set 3 .21 | 0   | 0    | 0    | 1     | 0     | 10.45        | 0               | 96.9        | n.a. | LR          | LR  | LR   | LR  | LR    | 0.38      | 0.40        |
| Set 3 .22 | 0   | 1    | 0    | 1     | 0     | 82.2         | 0               | 83.4        | n.a. | HR          | HR  | IR   | HR  | HR    | -0.04     | -0.04       |
| Set 3 .23 | 0   | 0    | 0    | 0     | 0     | 34.66        | 0               | 35.2        | LR   | LR          | LR  | LR   | LR  | LR    | 0.56      | 0.51        |
| Set 3 .24 | 0   | 0    | 0    | 0     | 0     | 52.24        | 0               | 53.0        | LR   | LR          | LR  | LR   | LR  | LR    | 0.53      | 0.53        |
| Set 3 .25 | 1   | 1    | 0    | 0     | 0     | 105.4        | 0               | 106.9       | HR   | HR          | HR  | HR   | HR  | HR    | -0.36     | -0.38       |
| Set 3 .26 | 0   | 0    | 0    | 0     | 0     | 21.39        | 0               | 74.3        | IR   | LR          | LR  | LR   | LR  | LR    | 1.00      | 1.02        |
| Set 3 .27 | 0   | 0    | 0    | 0     | 0     | 34.4         | 0               | 34.9        | LR   | LR          | LR  | LR   | LR  | LR    | 0.48      | 0.50        |
| Set 3 .28 | 0   | 0    | 0    | 0     | 0     | 32.66        | 0               | 33.1        | LR   | LR          | IR  | IR   | LR  | LR    | 0.57      | 0.59        |
| Set 3 .29 | 0   | 0    | 0    | 0     | 0     | 64.43        | 0               | 65.4        | LR   | LR          | LR  | LR   | LR  | LR    | 0.43      | 0.46        |
| Set 3 .30 | 0   | 0    | 0    | 0     | 0     | 29.01        | 0               | 29.4        | LR   | LR          | LR  | LR   | LR  | LR    | 0.28      | 0.22        |
| Set 3 .31 | 1   | 0    | 0    | 0     | 0     | 78.09        | 0               | 79.2        | IR   | LR          | LR  | LR   | LR  | LR    | 0.77      | 0.80        |
| Set 3 .32 | 0   | 0    | 0    | 0     | 0     | 137.69       | 0               | 139.7       | LR   | LR          | LR  | LR   | LR  | LR    | 0.41      | 0.46        |
| Set 3 .33 | 0   | 0    | 0    | 0     | 0     | 120.54       | 0               | 122.3       | IR   | LR          | LR  | LR   | LR  | LR    | 0.11      | 0.08        |
| Set 3 .34 | 0   | 0    | 0    | 0     | 0     | 128.07       | 0               | 129.9       | LR   | LR          | LR  | LR   | LR  | LR    | 0.33      | 0.40        |



|           |   |   |   |   |   |        |   |       |      |    |    |    |    |    |       |       |
|-----------|---|---|---|---|---|--------|---|-------|------|----|----|----|----|----|-------|-------|
| Set 3 .35 | 0 | 0 | 0 | 0 | 0 | 15.93  | 0 | 96.1  | LR   | LR | LR | LR | LR | LR | 1.13  | 1.09  |
| Set 3 .36 | 0 | 0 | 0 | 0 | 0 | 45.14  | 0 | 45.8  | LR   | LR | LR | LR | LR | LR | 0.32  | 0.32  |
| Set 3 .37 | 0 | 0 | 0 | 0 | 0 | 39.79  | 0 | 40.4  | LR   | LR | LR | LR | LR | LR | 0.83  | 0.88  |
| Set 3 .38 | 0 | 0 | 0 | 0 | 0 | 48.2   | 0 | 48.9  | LR   | LR | LR | LR | LR | LR | 0.31  | 0.39  |
| Set 3 .39 | 0 | 0 | 0 | 0 | 0 | 123.79 | 0 | 125.6 | LR   | LR | IR | IR | LR | LR | 0.87  | 0.85  |
| Set 3 .40 | 0 | 1 | 0 | 0 | 0 | 116.11 | 0 | 117.8 | n.a. | HR | HR | HR | LR | LR | 0.68  | 0.70  |
| Set 3 .41 | 0 | 0 | 0 | 0 | 0 | 23.23  | 0 | 23.6  | n.a. | LR | LR | LR | LR | LR | 0.17  | 0.17  |
| Set 3 .42 | 0 | 0 | 0 | 0 | 0 | 84.01  | 0 | 85.2  | LR   | LR | LR | LR | LR | LR | 1.07  | 1.08  |
| Set 3 .43 | 0 | 0 | 0 | 0 | 0 | 95.28  | 0 | 96.7  | LR   | LR | LR | LR | LR | LR | 0.31  | 0.32  |
| Set 3 .44 | 0 | 0 | 0 | 0 | 1 | 9.4    | 0 | 76.0  | LR   | LR | LR | LR | LR | LR | 0.03  | 0.09  |
| Set 3 .45 | 0 | 0 | 1 | 1 | 0 | 75.76  | 0 | 76.9  | HR   | HR | HR | HR | HR | HR | -1.30 | -1.44 |
| Set 3 .46 | 1 | 0 | 0 | 0 | 0 | 32.3   | 0 | 32.8  | LR   | LR | LR | LR | LR | LR | 1.84  | 1.97  |
| Set 3 .47 | 1 | 1 | 1 | 1 | 1 | 6.6    | 1 | 6.9   | HR   | HR | HR | HR | HR | HR | -1.59 | -1.71 |
| Set 3 .48 | 1 | 1 | 0 | 0 | 1 | 21.19  | 1 | 30.0  | HR   | HR | HR | HR | LR | LR | 0.07  | 0.22  |
| Set 3 .49 | 0 | 0 | 0 | 1 | 0 | 76.12  | 0 | 77.2  | LR   | LR | LR | LR | HR | HR | -0.06 | -0.05 |
| Set 3 .50 | 0 | 0 | 0 | 0 | 0 | 87.43  | 0 | 88.7  | LR   | LR | LR | LR | LR | LR | 0.55  | 0.55  |
| Set 3 .51 | 1 | 1 | 0 | 0 | 1 | 20.73  | 1 | 46.6  | HR   | HR | HR | HR | HR | HR | -0.63 | -0.58 |
| Set 3 .52 | 1 | 1 | 0 | 0 | 1 | 16.33  | 1 | 48.2  | HR   | HR | HR | HR | HR | HR | -0.45 | -0.38 |
| Set 3 .53 | 0 | 0 | 0 | 0 | 0 | 67.06  | 0 | 68.0  | LR   | LR | LR | LR | LR | LR | 0.34  | 0.31  |
| Set 3 .54 | 1 | 1 | 0 | 1 | 1 | 18.46  | 0 | 57.2  | HR   | HR | HR | HR | HR | HR | -0.47 | -0.48 |
| Set 3 .55 | 0 | 0 | 0 | 0 | 0 | 108.19 | 0 | 109.8 | LR   | LR | LR | LR | LR | LR | 1.07  | 1.09  |
| Set 3 .56 | 0 | 1 | 0 | 0 | 0 | 84.63  | 0 | 85.9  | n.a. | HR | HR | HR | HR | HR | -0.05 | -0.12 |
| Set 3 .57 | 1 | 0 | 0 | 0 | 0 | 91.33  | 0 | 92.7  | LR   | LR | LR | LR | LR | LR | 0.19  | 0.20  |
| Set 3 .58 | 1 | 1 | 1 | 1 | 1 | 31.08  | 1 | 45.8  | HR   | HR | HR | HR | HR | HR | -1.36 | -1.50 |
| Set 3 .59 | 1 | 1 | 0 | 0 | 0 | 57.56  | 0 | 58.4  | HR   | HR | HR | HR | HR | HR | -0.86 | -0.84 |
| Set 3 .60 | 0 | 0 | 1 | 1 | 0 | 51.09  | 0 | 51.8  | HR   | HR | HR | HR | HR | HR | -0.37 | -0.46 |
| Set 3 .61 | 1 | 1 | 0 | 1 | 0 | 44.71  | 0 | 45.4  | HR   | HR | HR | HR | LR | LR | 0.30  | 0.40  |
| Set 3 .62 | 0 | 0 | 0 | 0 | 0 | 88.94  | 0 | 90.2  | LR   | LR | IR | LR | LR | LR | 0.61  | 0.61  |
| Set 3 .63 | 1 | 1 | 0 | 0 | 0 | 123.96 | 0 | 125.8 | HR   | HR | HR | HR | LR | LR | 0.98  | 1.01  |
| Set 3 .64 | 0 | 0 | 0 | 0 | 0 | 86.7   | 0 | 88.0  | LR   | LR | LR | LR | LR | LR | 0.13  | 0.24  |
| Set 3 .65 | 0 | 0 | 0 | 0 | 0 | 71.49  | 0 | 72.5  | HR   | LR | LR | LR | HR | HR | -0.22 | -0.19 |
| Set 3 .66 | 1 | 1 | 0 | 0 | 1 | 18.23  | 1 | 25.4  | HR   | HR | HR | HR | HR | HR | -0.40 | -0.40 |
| Set 3 .67 | 0 | 0 | 0 | 0 | 1 | 9.72   | 0 | 46.4  | LR   | LR | IR | LR | HR | HR | -0.57 | -0.53 |
| Set 3 .68 | 1 | 1 | 0 | 1 | 1 | 31.87  | 1 | 46.7  | HR   | HR | HR | HR | HR | HR | -1.05 | -1.06 |
| Set 3 .69 | 0 | 0 | 0 | 0 | 0 | 124.09 | 0 | 125.9 | n.a. | LR | LR | LR | LR | LR | 0.53  | 0.66  |
| Set 3 .70 | 0 | 0 | 0 | 0 | 0 | 93.6   | 0 | 95.0  | LR   | LR | IR | LR | LR | LR | 0.59  | 0.57  |
| Set 3 .71 | 1 | 0 | 0 | 0 | 0 | 115.29 | 0 | 117.0 | n.a. | LR | LR | LR | LR | LR | 0.35  | 0.41  |
| Set 3 .72 | 1 | 0 | 0 | 0 | 0 | 67.22  | 0 | 68.2  | n.a. | LR | LR | LR | LR | LR | 0.74  | 0.77  |
| Set 3 .73 | 1 | 0 | 0 | 0 | 0 | 164.9  | 0 | 167.3 | IR   | LR | LR | LR | LR | LR | 0.99  | 1.03  |
| Set 3 .74 | 1 | 0 | 1 | 1 | 0 | 49.41  | 0 | 50.1  | HR   | HR | HR | HR | HR | HR | -2.29 | -2.47 |
| Set 3 .75 | 0 | 0 | 0 | 0 | 0 | 99.58  | 0 | 101.0 | LR   | LR | LR | LR | LR | LR | 0.42  | 0.49  |
| Set 3 .76 | 0 | 1 | 0 | 0 | 0 | 114.76 | 0 | 116.4 | n.a. | IR | IR | IR | HR | HR | -0.82 | -0.88 |

|            |   |   |   |   |   |        |   |       |      |    |      |    |    |    |       |       |
|------------|---|---|---|---|---|--------|---|-------|------|----|------|----|----|----|-------|-------|
| Set 3 .77  | 1 | 0 | 1 | 1 | 0 | 38.8   | 0 | 39.4  | HR   | HR | HR   | HR | HR | HR | -0.83 | -0.95 |
| Set 3 .78  | 1 | 0 | 1 | 1 | 0 | 50.63  | 0 | 51.4  | HR   | HR | HR   | HR | HR | HR | -1.84 | -2.02 |
| Set 3 .79  | 1 | 0 | 0 | 0 | 1 | 22.51  | 0 | 76.2  | IR   | IR | HR   | IR | LR | LR | 0.13  | 0.26  |
| Set 3 .80  | 0 | 0 | 0 | 0 | 0 | 68.8   | 0 | 69.8  | LR   | LR | LR   | LR | LR | LR | 1.60  | 1.59  |
| Set 3 .81  | 1 | 0 | 1 | 1 | 0 | 78.55  | 0 | 79.7  | HR   | HR | HR   | HR | HR | HR | -1.74 | -1.98 |
| Set 3 .82  | 0 | 0 | 0 | 0 | 0 | 72.08  | 0 | 73.1  | LR   | LR | LR   | LR | LR | LR | 0.10  | 0.13  |
| Set 3 .83  | 0 | 0 | 0 | 0 | 0 | 108.52 | 0 | 110.1 | LR   | LR | LR   | LR | LR | LR | 0.93  | 0.98  |
| Set 3 .84  | 0 | 0 | 0 | 0 | 0 | 66.43  | 0 | 67.4  | LR   | LR | LR   | LR | LR | LR | 0.47  | 0.53  |
| Set 3 .85  | 0 | 0 | 0 | 0 | 0 | 107.33 | 0 | 108.9 | LR   | LR | LR   | LR | LR | LR | 0.72  | 0.75  |
| Set 3 .86  | 0 | 0 | 0 | 1 | 0 | 92.85  | 0 | 94.2  | IR   | IR | LR   | LR | LR | LR | 0.21  | 0.22  |
| Set 3 .87  | 0 | 0 | 0 | 0 | 0 | 112.39 | 0 | 114.0 | LR   | LR | n.a. | IR | LR | LR | 0.59  | 0.58  |
| Set 3 .88  | 0 | 0 | 0 | 0 | 0 | 58.94  | 0 | 59.8  | LR   | LR | LR   | LR | LR | LR | 0.58  | 0.61  |
| Set 3 .89  | 0 | 1 | 1 | 1 | 1 | 10.71  | 1 | 13.0  | HR   | HR | HR   | HR | HR | HR | -1.37 | -1.50 |
| Set 3 .90  | 1 | 1 | 0 | 0 | 1 | 30.29  | 1 | 41.6  | HR   | HR | HR   | HR | HR | HR | -0.70 | -0.75 |
| Set 3 .91  | 0 | 0 | 0 | 0 | 0 | 69.03  | 0 | 70.0  | LR   | LR | LR   | LR | LR | LR | 0.67  | 0.68  |
| Set 3 .92  | 1 | 1 | 0 | 1 | 1 | 66.23  | 1 | 67.2  | HR   | HR | HR   | HR | LR | LR | 0.35  | 0.46  |
| Set 3 .93  | 1 | 1 | 0 | 1 | 0 | 105.76 | 0 | 107.3 | HR   | HR | HR   | HR | HR | HR | -0.30 | -0.31 |
| Set 3 .94  | 0 | 0 | 0 | 0 | 0 | 107.86 | 0 | 109.4 | LR   | LR | LR   | LR | LR | LR | 0.74  | 0.75  |
| Set 3 .95  | 0 | 1 | 0 | 0 | 1 | 57.56  | 0 | 81.3  | n.a. | IR | IR   | IR | HR | HR | -0.08 | -0.15 |
| Set 3 .96  | 1 | 1 | 0 | 0 | 1 | 27.53  | 1 | 51.6  | HR   | HR | HR   | HR | HR | HR | -0.56 | -0.61 |
| Set 3 .97  | 0 | 0 | 1 | 1 | 1 | 3.68   | 0 | 80.8  | HR   | HR | LR   | HR | HR | HR | -0.84 | -0.84 |
| Set 3 .98  | 0 | 0 | 0 | 0 | 0 | 60.02  | 0 | 60.9  | LR   | LR | LR   | LR | LR | LR | 0.28  | 0.33  |
| Set 3 .99  | 1 | 1 | 0 | 0 | 1 | 19.48  | 1 | 45.4  | HR   | HR | HR   | HR | HR | HR | -0.74 | -0.74 |
| Set 3 .100 | 0 | 0 | 0 | 0 | 0 | 87.75  | 0 | 89.0  | LR   | LR | LR   | LR | LR | LR | 0.82  | 0.89  |
| Set 3 .101 | 0 | 0 | 0 | 0 | 0 | 86.47  | 0 | 87.7  | LR   | LR | LR   | LR | LR | LR | 0.70  | 0.81  |
| Set 3 .102 | 1 | 0 | 0 | 0 | 0 | 94.85  | 0 | 96.2  | LR   | LR | LR   | LR | LR | LR | 0.56  | 0.65  |
| Set 3 .103 | 0 | 0 | 0 | 0 | 0 | 95.54  | 0 | 96.9  | LR   | LR | LR   | LR | LR | LR | 1.28  | 1.25  |
| Set 3 .104 | 1 | 1 | 0 | 0 | 1 | 13.6   | 1 | 44.2  | HR   | HR | HR   | HR | LR | LR | 0.46  | 0.56  |
| Set 3 .105 | 1 | 0 | 0 | 0 | 0 | 63.21  | 0 | 64.1  | IR   | LR | LR   | LR | HR | HR | -0.11 | -0.09 |
| Set 3 .106 | 0 | 0 | 0 | 0 | 0 | 60.22  | 0 | 61.1  | LR   | LR | IR   | LR | LR | LR | 0.41  | 0.35  |
| Set 3 .107 | 0 | 0 | 0 | 0 | 0 | 124.91 | 0 | 126.7 | LR   | LR | LR   | LR | LR | LR | 0.35  | 0.32  |
| Set 3 .108 | 1 | 1 | 0 | 0 | 0 | 73.72  | 0 | 74.8  | HR   | HR | HR   | HR | LR | LR | 0.13  | 0.13  |
| Set 3 .109 | 0 | 0 | 0 | 0 | 0 | 109.24 | 0 | 110.8 | n.a. | LR | LR   | LR | LR | LR | 0.40  | 0.47  |
| Set 3 .110 | 1 | 1 | 0 | 0 | 1 | 26.68  | 1 | 48.5  | HR   | HR | HR   | HR | HR | HR | -0.31 | -0.29 |
| Set 3 .111 | 1 | 0 | 1 | 1 | 0 | 48.53  | 0 | 49.2  | HR   | HR | HR   | HR | HR | HR | -1.69 | -1.76 |
| Set 3 .112 | 0 | 0 | 0 | 0 | 0 | 108.81 | 0 | 110.4 | LR   | LR | LR   | LR | LR | LR | 0.89  | 0.95  |
| Set 3 .113 | 1 | 0 | 0 | 0 | 0 | 71.39  | 0 | 72.4  | LR   | LR | LR   | LR | LR | LR | 0.79  | 0.91  |
| Set 3 .114 | 1 | 1 | 0 | 1 | 0 | 81.84  | 0 | 83.0  | HR   | HR | HR   | HR | LR | LR | 0.01  | 0.03  |
| Set 3 .115 | 0 | 0 | 0 | 0 | 0 | 59.1   | 0 | 60.0  | LR   | LR | LR   | LR | LR | LR | 0.66  | 0.67  |
| Set 3 .116 | 0 | 1 | 0 | 0 | 0 | 69.82  | 0 | 70.8  | n.a. | HR | HR   | HR | LR | LR | 0.62  | 0.59  |
| Set 3 .117 | 0 | 0 | 0 | 0 | 0 | 107.63 | 0 | 109.2 | LR   | LR | LR   | LR | LR | LR | 0.82  | 0.89  |
| Set 3 .118 | 1 | 1 | 0 | 0 | 0 | 80.07  | 0 | 81.2  | HR   | HR | HR   | HR | LR | LR | 0.17  | 0.18  |

|            |   |   |   |   |   |        |   |       |      |    |    |    |    |    |       |       |
|------------|---|---|---|---|---|--------|---|-------|------|----|----|----|----|----|-------|-------|
| Set 3 .119 | 0 | 0 | 0 | 0 | 0 | 65.58  | 0 | 66.5  | LR   | LR | LR | LR | LR | LR | 0.59  | 0.62  |
| Set 3 .120 | 1 | 1 | 0 | 0 | 1 | 15.97  | 1 | 43.1  | HR   | HR | HR | HR | HR | HR | -1.44 | -1.57 |
| Set 3 .121 | 0 | 0 | 0 | 0 | 0 | 110.29 | 0 | 111.9 | LR   | LR | LR | LR | LR | LR | 1.12  | 1.19  |
| Set 3 .122 | 1 | 1 | 0 | 0 | 0 | 111.01 | 0 | 112.6 | n.a. | HR | HR | HR | LR | LR | 0.33  | 0.24  |
| Set 3 .123 | 1 | 1 | 1 | 1 | 0 | 134.37 | 0 | 136.3 | HR   | HR | HR | HR | HR | HR | -0.81 | -0.91 |
| Set 3 .124 | 1 | 0 | 0 | 0 | 0 | 111.31 | 0 | 112.9 | IR   | LR | LR | LR | LR | LR | 0.26  | 0.34  |
| Set 3 .125 | 0 | 0 | 0 | 0 | 0 | 103.92 | 0 | 105.4 | LR   | LR | LR | LR | LR | LR | 0.44  | 0.51  |
| Set 3 .126 | 0 | 0 | 0 | 0 | 0 | 71.75  | 0 | 72.8  | n.a. | LR | LR | LR | LR | LR | 0.24  | 0.23  |
| Set 3 .127 | 0 | 0 | 0 | 0 | 0 | 58.41  | 0 | 59.3  | LR   | LR | LR | LR | LR | LR | 0.63  | 0.66  |
| Set 3 .128 | 0 | 0 | 0 | 0 | 0 | 69.75  | 0 | 70.8  | LR   | LR | LR | LR | LR | LR | 0.90  | 0.91  |
| Set 3 .129 | 0 | 0 | 0 | 0 | 0 | 76.52  | 0 | 77.6  | LR   | LR | LR | LR | LR | LR | 0.65  | 0.66  |
| Set 3 .130 | 0 | 0 | 1 | 1 | 1 | 20.37  | 1 | 36.0  | HR   | HR | HR | HR | HR | HR | -1.23 | -1.37 |
| Set 3 .131 | 0 | 1 | 0 | 0 | 0 | 106.74 | 0 | 108.3 | n.a. | HR | HR | HR | HR | HR | -0.39 | -0.23 |
| Set 3 .132 | 0 | 0 | 0 | 0 | 0 | 109.86 | 0 | 111.5 | LR   | LR | LR | LR | LR | LR | 0.60  | 0.58  |
| Set 3 .133 | 1 | 1 | 0 | 0 | 1 | 11.73  | 1 | 16.0  | HR   | HR | HR | HR | HR | HR | -0.28 | -0.18 |
| Set 3 .134 | 0 | 0 | 0 | 0 | 0 | 100.76 | 0 | 102.2 | IR   | LR | LR | LR | LR | LR | 0.50  | 0.55  |
| Set 3 .135 | 0 | 0 | 0 | 0 | 0 | 94.46  | 0 | 95.8  | LR   | LR | LR | LR | LR | LR | 0.10  | 0.10  |
| Set 3 .136 | 1 | 1 | 0 | 1 | 1 | 13.83  | 1 | 21.3  | HR   | HR | HR | HR | HR | HR | -1.01 | -1.07 |
| Set 3 .137 | 1 | 0 | 0 | 0 | 0 | 28.78  | 0 | 29.2  | IR   | LR | LR | LR | LR | LR | 0.88  | 0.89  |
| Set 3 .138 | 1 | 1 | 0 | 0 | 1 | 48.62  | 0 | 72.1  | HR   | HR | HR | HR | HR | HR | -0.68 | -0.70 |
| Set 3 .139 | 0 | 1 | 0 | 0 | 0 | 98.92  | 0 | 100.4 | n.a. | HR | HR | HR | LR | LR | 0.12  | 0.08  |
| Set 3 .140 | 1 | 1 | 0 | 1 | 1 | 6.44   | 1 | 33.8  | HR   | HR | HR | HR | HR | HR | -1.33 | -1.51 |
| Set 3 .141 | 1 | 1 | 1 | 1 | 1 | 11.93  | 1 | 35.4  | HR   | HR | HR | HR | HR | HR | -1.97 | -2.10 |
| Set 3 .142 | 0 | 1 | 1 | 1 | 1 | 15.84  | 1 | 29.6  | HR   | HR | HR | HR | HR | HR | -2.24 | -2.36 |
| Set 3 .143 | 1 | 1 | 1 | 1 | 1 | 14.55  | 1 | 26.1  | HR   | HR | HR | HR | HR | HR | -2.19 | -2.29 |
| Set 3 .144 | 0 | 0 | 0 | 0 | 1 | 13.11  | 1 | 14.0  | HR   | LR | LR | LR | HR | HR | -0.26 | -0.36 |
| Set 3 .145 | 0 | 0 | 0 | 0 | 1 | 1.77   | 0 | 43.6  | IR   | LR | LR | LR | HR | HR | -0.62 | -0.68 |
| Set 3 .146 | 1 | 0 | 0 | 1 | 1 | 1.84   | 1 | 17.4  | IR   | IR | LR | LR | HR | HR | -0.09 | -0.16 |
| Set 3 .147 | 1 | 1 | 0 | 0 | 1 | 20.44  | 1 | 71.1  | HR   | HR | HR | HR | HR | HR | -0.60 | -0.53 |
| Set 3 .148 | 1 | 1 | 0 | 1 | 1 | 17.48  | 1 | 20.9  | HR   | HR | HR | HR | HR | HR | -0.12 | -0.12 |
| Set 3 .149 | 0 | 1 | 0 | 0 | 1 | 0.3    | 1 | 0.3   | n.a. | IR | IR | IR | HR | HR | -1.07 | -0.99 |
| Set 3 .150 | 0 | 1 | 1 | 1 | 1 | 6.97   | 1 | 7.3   | HR   | HR | HR | HR | HR | HR | -1.44 | -1.55 |
| Set 3 .151 | 1 | 1 | 1 | 1 | 1 | 27.6   | 1 | 39.7  | HR   | HR | HR | HR | HR | HR | -0.87 | -0.98 |
| Set 3 .152 | 1 | 1 | 1 | 1 | 1 | 10.02  | 1 | 12.5  | HR   | HR | HR | HR | HR | HR | -0.82 | -0.91 |
| Set 3 .153 | 0 | 0 | 0 | 0 | 0 | 31.51  | 0 | 32.0  | n.a. | LR | LR | LR | HR | HR | -0.65 | -0.59 |
| Set 3 .154 | 0 | 0 | 0 | 0 | 0 | 30.85  | 0 | 31.3  | LR   | LR | LR | LR | HR | HR | -0.09 | -0.05 |
| Set 3 .155 | 0 | 0 | 0 | 0 | 0 | 85.19  | 0 | 86.4  | LR   | LR | IR | LR | LR | LR | 0.47  | 0.54  |
| Set 3 .156 | 0 | 0 | 0 | 0 | 0 | 125.9  | 0 | 127.7 | LR   | LR | IR | LR | HR | HR | -0.18 | -0.18 |
| Set 3 .157 | 1 | 0 | 0 | 0 | 0 | 58.91  | 0 | 59.8  | LR   | LR | LR | LR | HR | HR | -0.94 | -0.88 |
| Set 3 .158 | 0 | 0 | 0 | 0 | 0 | 36.76  | 0 | 37.3  | LR   | LR | LR | LR | LR | LR | 0.14  | 0.20  |
| Set 3 .159 | 0 | 1 | 0 | 0 | 1 | 16.2   | 0 | 104.3 | n.a. | IR | IR | IR | HR | HR | -1.98 | -1.80 |
| Set 3 .160 | 0 | 0 | 0 | 0 | 0 | 67.58  | 0 | 68.6  | LR   | LR | LR | LR | HR | HR | -0.59 | -0.45 |

|            |   |   |   |   |   |        |   |       |      |      |    |    |    |    |       |       |
|------------|---|---|---|---|---|--------|---|-------|------|------|----|----|----|----|-------|-------|
| Set 3 .161 | 0 | 0 | 0 | 1 | 1 | 6.8    | 0 | 38.6  | HR   | LR   | LR | LR | HR | HR | -0.81 | -0.80 |
| Set 3 .162 | 1 | 0 | 0 | 0 | 1 | 11.93  | 0 | 16.6  | LR   | LR   | LR | LR | HR | HR | -0.92 | -1.01 |
| Set 3 .163 | 0 | 0 | 0 | 0 | 1 | 22.14  | 1 | 60.7  | IR   | LR   | LR | LR | HR | HR | -1.32 | -1.42 |
| Set 3 .164 | 1 | 0 | 1 | 1 | 1 | 8.21   | 1 | 12.1  | HR   | HR   | HR | HR | HR | HR | -2.61 | -2.86 |
| Set 3 .165 | 0 | 0 | 0 | 0 | 1 | 3.45   | 0 | 146.7 | LR   | LR   | LR | LR | HR | HR | -0.99 | -1.09 |
| Set 3 .166 | 1 | 0 | 1 | 1 | 1 | 17.15  | 1 | 55.2  | HR   | HR   | HR | HR | HR | HR | -1.41 | -1.49 |
| Set 3 .167 | 0 | 1 | 1 | 1 | 1 | 14.23  | 1 | 23.7  | HR   | HR   | HR | HR | HR | HR | -1.22 | -1.36 |
| Set 3 .168 | 1 | 0 | 0 | 0 | 1 | 24.94  | 1 | 59.1  | LR   | LR   | LR | LR | HR | HR | -0.81 | -0.81 |
| Set 3 .169 | 0 | 0 | 0 | 0 | 0 | 16.95  | 0 | 17.2  | LR   | LR   | LR | LR | LR | LR | 1.10  | 1.08  |
| Set 3 .170 | 0 | 0 | 0 | 0 | 0 | 72.18  | 0 | 73.2  | LR   | LR   | IR | IR | LR | LR | 0.48  | 0.49  |
| Set 3 .171 | 0 | 0 | 0 | 1 | 0 | 106.78 | 0 | 108.3 | IR   | IR   | IR | LR | LR | LR | 0.08  | 0.01  |
| Set 3 .172 | 0 | 0 | 0 | 0 | 0 | 162.23 | 0 | 164.6 | LR   | LR   | IR | LR | HR | HR | -0.09 | -0.09 |
| Set 3 .173 | 1 | 0 | 0 | 0 | 1 | 40.94  | 0 | 66.6  | IR   | IR   | HR | IR | HR | HR | -0.84 | -0.91 |
| Set 3 .174 | 1 | 0 | 0 | 0 | 0 | 55.79  | 0 | 56.6  | LR   | IR   | IR | IR | LR | LR | 1.28  | 1.28  |
| Set 3 .175 | 0 | 0 | 0 | 0 | 0 | 66.23  | 0 | 94.5  | IR   | LR   | IR | LR | LR | LR | 0.69  | 0.74  |
| Set 3 .176 | 0 | 0 | 0 | 1 | 0 | 44.78  | 0 | 45.4  | IR   | IR   | IR | LR | LR | LR | 0.65  | 0.69  |
| Set 3 .177 | 0 | 0 | 0 | 0 | 0 | 45.93  | 0 | 46.6  | LR   | LR   | IR | LR | LR | LR | 0.28  | 0.40  |
| Set 3 .178 | 0 | 0 | 0 | 0 | 0 | 35.71  | 0 | 36.2  | LR   | LR   | IR | LR | HR | HR | -0.13 | -0.17 |
| Set 3 .179 | 0 | 0 | 0 | 0 | 0 | 54.28  | 0 | 55.1  | LR   | LR   | LR | LR | LR | LR | 1.44  | 1.27  |
| Set 3 .180 | 0 | 0 | 0 | 0 | 0 | 37.06  | 0 | 62.7  | LR   | LR   | IR | LR | LR | LR | 1.09  | 0.98  |
| Set 3 .181 | 0 | 0 | 0 | 0 | 0 | 41.95  | 0 | 42.6  | LR   | LR   | LR | LR | HR | HR | -0.09 | -0.14 |
| Set 3 .182 | 0 | 0 | 0 | 0 | 0 | 79.7   | 0 | 80.9  | n.a. | LR   | LR | LR | LR | LR | 0.29  | 0.25  |
| Set 3 .183 | 0 | 0 | 0 | 0 | 0 | 115.42 | 0 | 117.1 | LR   | LR   | IR | IR | LR | LR | 0.19  | 0.10  |
| Set 3 .184 | 0 | 0 | 0 | 0 | 0 | 59.1   | 0 | 60.0  | LR   | LR   | LR | LR | LR | LR | 0.61  | 0.59  |
| Set 3 .185 | 0 | 0 | 0 | 0 | 0 | 54.34  | 0 | 55.1  | LR   | LR   | LR | LR | LR | LR | 1.08  | 1.15  |
| Set 3 .186 | 0 | 0 | 0 | 0 | 0 | 88.05  | 0 | 89.3  | LR   | LR   | LR | LR | LR | LR | 0.14  | 0.23  |
| Set 3 .187 | 0 | 0 | 0 | 0 | 0 | 50.14  | 0 | 50.9  | LR   | LR   | LR | LR | LR | LR | 1.07  | 1.07  |
| Set 3 .188 | 0 | 0 | 0 | 0 | 0 | 26.15  | 0 | 26.5  | LR   | LR   | LR | LR | LR | LR | 0.65  | 0.73  |
| Set 3 .189 | 0 | 0 | 0 | 0 | 0 | 61.01  | 0 | 61.9  | LR   | LR   | LR | LR | LR | LR | 0.39  | 0.42  |
| Set 3 .190 | 0 | 0 | 0 | 0 | 0 | 6.31   | 0 | 50.3  | LR   | LR   | LR | LR | LR | LR | 1.32  | 1.35  |
| Set 3 .191 | 0 | 0 | 0 | 0 | 0 | 33.38  | 0 | 33.9  | LR   | LR   | LR | LR | HR | HR | -0.64 | -0.56 |
| Set 3 .192 | 0 | 0 | 0 | 0 | 0 | 95.54  | 0 | 96.9  | LR   | LR   | LR | LR | LR | LR | 0.67  | 0.73  |
| Set 3 .193 | 0 | 0 | 0 | 0 | 0 | 67.52  | 0 | 68.5  | LR   | LR   | LR | LR | LR | LR | 0.01  | 0.05  |
| Set 3 .194 | 0 | 0 | 0 | 0 | 0 | 158.62 | 0 | 160.9 | n.a. | LR   | LR | LR | LR | LR | 0.30  | 0.31  |
| Set 3 .195 | 0 | 0 | 0 | 0 | 0 | 83.75  | 0 | 85.0  | n.a. | LR   | LR | LR | LR | LR | 0.74  | 0.74  |
| Set 3 .196 | 0 | 0 | 0 | 0 | 0 | 71.2   | 0 | 72.2  | LR   | LR   | LR | LR | LR | LR | 0.02  | 0.12  |
| Set 3 .197 | 0 | 0 | 0 | 0 | 0 | 34.92  | 0 | 35.4  | LR   | LR   | LR | LR | LR | LR | 0.06  | 0.14  |
| Set 3 .198 | 0 | 0 | 0 | 0 | 0 | 74.71  | 0 | 75.8  | LR   | LR   | IR | LR | LR | LR | 0.62  | 0.68  |
| Set 3 .199 | 0 | 0 | 0 | 0 | 0 | 10.18  | 0 | 10.3  | n.a. | n.a. | IR | LR | LR | LR | 0.94  | 0.95  |
| Set 3 .200 | 0 | 0 | 0 | 0 | 0 | 109.9  | 0 | 111.5 | n.a. | LR   | LR | LR | LR | LR | 0.55  | 0.60  |
| Set 3 .201 | 0 | 0 | 0 | 0 | 0 | 81.05  | 0 | 82.2  | LR   | LR   | LR | LR | LR | LR | 0.34  | 0.22  |
| Set 3 .202 | 0 | 0 | 0 | 0 | 0 | 94     | 0 | 95.4  | LR   | LR   | LR | LR | LR | LR | 1.31  | 1.36  |

|            |   |   |   |   |   |        |   |       |      |      |    |    |    |    |       |       |
|------------|---|---|---|---|---|--------|---|-------|------|------|----|----|----|----|-------|-------|
| Set 3 .203 | 0 | 0 | 0 | 0 | 0 | 90.38  | 0 | 91.7  | LR   | LR   | LR | LR | LR | LR | 0.97  | 1.02  |
| Set 3 .204 | 1 | 1 | 0 | 1 | 0 | 44.32  | 0 | 45.0  | HR   | HR   | HR | HR | HR | HR | -0.24 | -0.19 |
| Set 3 .205 | 0 | 0 | 0 | 0 | 0 | 121.56 | 0 | 123.3 | LR   | LR   | LR | LR | LR | LR | 1.13  | 1.13  |
| Set 3 .206 | 0 | 0 | 0 | 0 | 0 | 61.14  | 0 | 62.0  | LR   | LR   | LR | LR | LR | LR | 0.68  | 0.65  |
| Set 3 .207 | 0 | 0 | 0 | 0 | 0 | 93.83  | 0 | 95.2  | LR   | LR   | LR | LR | LR | LR | 0.73  | 0.76  |
| Set 3 .208 | 0 | 0 | 0 | 0 | 0 | 1.08   | 0 | 80.5  | IR   | LR   | LR | LR | LR | LR | 1.20  | 1.17  |
| Set 3 .209 | 0 | 0 | 0 | 0 | 0 | 5.52   | 0 | 78.9  | LR   | LR   | LR | LR | LR | LR | 1.36  | 1.32  |
| Set 3 .210 | 1 | 0 | 0 | 1 | 0 | 28.35  | 0 | 28.8  | IR   | LR   | LR | LR | LR | LR | 0.59  | 0.76  |
| Set 3 .211 | 0 | 0 | 0 | 0 | 0 | 33.74  | 0 | 34.2  | IR   | LR   | LR | LR | HR | HR | -0.28 | -0.19 |
| Set 3 .212 | 0 | 0 | 0 | 0 | 0 | 4.34   | 0 | 70.6  | LR   | LR   | LR | LR | LR | LR | 2.08  | 1.99  |
| Set 3 .213 | 1 | 0 | 1 | 1 | 0 | 43.5   | 0 | 44.1  | HR   | HR   | HR | HR | HR | HR | -1.44 | -1.57 |
| Set 3 .214 | 1 | 0 | 0 | 1 | 0 | 91.79  | 0 | 93.1  | IR   | IR   | IR | IR | LR | LR | 1.33  | 1.31  |
| Set 3 .215 | 1 | 1 | 1 | 1 | 0 | 31.05  | 0 | 31.5  | HR   | HR   | HR | HR | HR | HR | -1.53 | -1.68 |
| Set 3 .216 | 0 | 0 | 0 | 0 | 0 | 41.66  | 0 | 42.3  | n.a. | LR   | LR | LR | HR | HR | -0.15 | -0.09 |
| Set 3 .217 | 0 | 0 | 0 | 0 | 1 | 41.46  | 0 | 42.3  | LR   | LR   | LR | LR | HR | HR | -1.09 | -0.98 |
| Set 3 .218 | 0 | 0 | 0 | 0 | 0 | 33.41  | 0 | 33.9  | LR   | LR   | LR | LR | LR | LR | 0.17  | 0.31  |
| Set 3 .219 | 0 | 0 | 0 | 0 | 0 | 38.21  | 0 | 38.8  | HR   | LR   | LR | LR | HR | HR | -1.46 | -1.33 |
| Set 3 .220 | 1 | 1 | 0 | 0 | 0 | 34.92  | 0 | 35.4  | HR   | HR   | HR | HR | HR | HR | -2.21 | -2.07 |
| Set 3 .221 | 1 | 1 | 0 | 0 | 0 | 31.01  | 0 | 31.5  | HR   | HR   | HR | HR | HR | HR | -1.13 | -1.08 |
| Set 3 .222 | 0 | 0 | 0 | 0 | 0 | 71.75  | 0 | 72.8  | IR   | LR   | IR | IR | HR | HR | -0.43 | -0.37 |
| Set 3 .223 | 1 | 0 | 0 | 1 | 1 | 15.87  | 1 | 28.2  | IR   | IR   | HR | IR | HR | HR | -2.05 | -2.05 |
| Set 3 .224 | 0 | 0 | 0 | 0 | 0 | 63.54  | 0 | 64.5  | LR   | LR   | LR | LR | LR | LR | 0.67  | 0.64  |
| Set 3 .225 | 0 | 1 | 0 | 0 | 0 | 43.24  | 0 | 43.9  | n.a. | HR   | HR | HR | HR | HR | -2.63 | -2.55 |
| Set 3 .226 | 1 | 1 | 1 | 1 | 1 | 7.03   | 1 | 12.0  | HR   | HR   | HR | HR | HR | HR | -2.67 | -2.78 |
| Set 3 .227 | 1 | 1 | 0 | 1 | 1 | 15.61  | 1 | 20.0  | HR   | HR   | HR | HR | HR | HR | -2.22 | -2.19 |
| Set 3 .228 | 0 | 0 | 0 | 0 | 0 | 81.41  | 0 | 82.6  | LR   | LR   | LR | LR | LR | LR | 1.27  | 1.14  |
| Set 3 .229 | 0 | 0 | 0 | 0 | 0 | 73.82  | 0 | 74.9  | LR   | LR   | LR | LR | LR | LR | 2.12  | 2.06  |
| Set 3 .230 | 0 | 0 | 0 | 0 | 0 | 77.37  | 0 | 78.5  | IR   | LR   | LR | LR | HR | HR | -0.50 | -0.47 |
| Set 3 .231 | 0 | 0 | 0 | 0 | 0 | 52.27  | 0 | 53.0  | LR   | LR   | LR | LR | LR | LR | 1.36  | 1.24  |
| Set 3 .232 | 0 | 0 | 0 | 0 | 0 | 40.05  | 0 | 40.6  | LR   | LR   | LR | LR | LR | LR | 1.09  | 1.08  |
| Set 3 .233 | 0 | 0 | 0 | 0 | 0 | 39     | 0 | 39.6  | LR   | LR   | LR | LR | LR | LR | 2.23  | 2.16  |
| Set 3 .234 | 0 | 0 | 0 | 0 | 0 | 54.74  | 0 | 55.5  | IR   | LR   | LR | LR | LR | LR | 0.68  | 0.67  |
| Set 3 .235 | 0 | 0 | 0 | 0 | 0 | 52.44  | 0 | 53.2  | LR   | LR   | LR | LR | LR | LR | 0.81  | 0.76  |
| Set 3 .236 | 1 | 0 | 1 | 0 | 1 | 17.22  | 1 | 19.7  | HR   | HR   | LR | HR | HR | HR | -1.52 | -1.64 |
| Set 3 .237 | 0 | 0 | 0 | 0 | 0 | 74.68  | 0 | 75.8  | LR   | LR   | LR | LR | HR | HR | -0.10 | -0.01 |
| Set 3 .238 | 0 | 0 | 0 | 0 | 0 | 39.39  | 0 | 40.0  | LR   | LR   | LR | LR | HR | HR | -0.29 | -0.28 |
| Set 3 .239 | 0 | 1 | 0 | 0 | 1 | 45.96  | 0 | 68.1  | n.a. | IR   | IR | IR | HR | HR | -0.29 | -0.24 |
| Set 3 .240 | 0 | 0 | 0 | 0 | 0 | 190.19 | 0 | 193.0 | n.a. | n.a. | IR | LR | HR | HR | -0.17 | -0.16 |
| Set 3 .241 | 1 | 0 | 0 | 0 | 0 | 37.09  | 0 | 37.6  | IR   | IR   | HR | IR | LR | LR | 1.58  | 1.69  |
| Set 3 .242 | 0 | 0 | 0 | 0 | 0 | 4.4    | 0 | 69.4  | LR   | LR   | LR | LR | LR | LR | 0.12  | 0.10  |
| Set 3 .243 | 0 | 0 | 0 | 0 | 0 | 46.26  | 0 | 46.9  | LR   | LR   | LR | LR | LR | LR | 1.99  | 1.98  |
| Set 3 .244 | 0 | 0 | 0 | 0 | 0 | 46.19  | 0 | 46.9  | LR   | LR   | LR | LR | LR | LR | 0.73  | 0.64  |

|            |   |   |   |   |   |       |   |       |    |    |    |    |    |    |       |       |
|------------|---|---|---|---|---|-------|---|-------|----|----|----|----|----|----|-------|-------|
| Set 3 .245 | 1 | 0 | 1 | 0 | 1 | 16.13 | 1 | 17.7  | HR | HR | HR | HR | HR | HR | -2.89 | -3.06 |
| Set 3 .246 | 1 | 1 | 0 | 0 | 1 | 25.63 | 0 | 28.0  | HR | HR | HR | IR | HR | HR | -1.78 | -1.76 |
| Set 3 .247 | 0 | 0 | 0 | 1 | 0 | 42.94 | 0 | 43.6  | HR | HR | LR | HR | HR | HR | -1.55 | -1.44 |
| Set 3 .248 | 1 | 1 | 0 | 0 | 1 | 23.26 | 0 | 36.2  | HR | HR | HR | HR | HR | HR | -1.23 | -1.13 |
| Set 3 .249 | 0 | 0 | 0 | 0 | 1 | 3.22  | 0 | 102.4 | LR | LR | IR | LR | LR | LR | 0.07  | 0.08  |
| Set 3 .250 | 1 | 1 | 0 | 0 | 0 | 34.27 | 0 | 34.8  | HR | HR | HR | HR | HR | HR | -0.11 | -0.10 |
| Set 3 .251 | 1 | 1 | 0 | 0 | 0 | 41.36 | 0 | 42.0  | HR | HR | HR | HR | HR | HR | -2.15 | -2.17 |

**Supplementary Table 1**

**Characteristics of the primary NB tumors used to develop and validate the prognostic model by qF**

Training cohort of 96 NB cases: (Grey) cases used to develop the Y36 model; (White) 60 cases used to test the model  
 Age: 0= <18m, 1= >18m; INSS: 0= Stage 1, 2, 3 or 4s, 1= Stage 4; MYCN status: 0= non-amplified, 1= amplified; 1pLOH: 0= non-deleted, 1= deleted, n.a.= not available

| Sample ID | Analysis     | Age | INSS Stage | MYCN | 1pLOH |
|-----------|--------------|-----|------------|------|-------|
| 1         | training set | 0   | 0          | 0    | 0     |
| 2         | training set | 1   | 1          | 0    | 0     |
| 3         | training set | 0   | 0          | 0    | 1     |
| 4         | training set | 0   | 1          | 0    | n.a.  |
| 5         | training set | 0   | 0          | 0    | 0     |
| 6         | training set | 1   | 1          | 0    | 0     |
| 7         | training set | 0   | 0          | 0    | 0     |
| 8         | training set | 0   | 0          | 0    | 0     |
| 9         | training set | 1   | 1          | 0    | 0     |
| 10        | training set | 1   | 0          | 1    | 1     |
| 11        | training set | 0   | 0          | 0    | 0     |
| 12        | training set | 1   | 0          | 0    | 0     |
| 13        | training set | 1   | 1          | 1    | 0     |
| 14        | training set | 1   | 1          | 1    | 1     |
| 15        | training set | 1   | 1          | 0    | 0     |
| 16        | training set | 0   | 1          | 1    | 1     |
| 17        | training set | 0   | 1          | 1    | 1     |
| 18        | training set | 0   | 1          | 0    | 0     |
| 19        | training set | 1   | 1          | 1    | n.a.  |
| 20        | training set | 1   | 0          | 1    | n.a.  |
| 21        | training set | 1   | 0          | 0    | 1     |
| 22        | training set | 1   | 0          | 1    | 1     |
| 23        | training set | 1   | 0          | 1    | n.a.  |
| 24        | training set | 1   | 1          | 0    | n.a.  |
| 25        | training set | 0   | 0          | 0    | n.a.  |
| 26        | training set | 0   | 0          | 0    | 0     |
| 27        | training set | 1   | 0          | 0    | 0     |
| 28        | training set | 0   | 0          | 0    | 0     |
| 29        | training set | 0   | 0          | 0    | 0     |
| 30        | training set | 0   | 0          | 0    | 0     |
| 31        | training set | 0   | 0          | 0    | 0     |
| 32        | training set | 0   | 1          | 0    | n.a.  |
| 33        | training set | 0   | 0          | 1    | n.a.  |
| 34        | training set | 1   | 1          | 0    | n.a.  |
| 35        | training set | 1   | 1          | 1    | n.a.  |
| 36        | training set | 1   | 1          | 0    | n.a.  |
| 37        | training set | 1   | 1          | 0    | 0     |
| 38        | training set | 1   | 0          | 1    | n.a.  |
| 39        | training set | 1   | 0          | 0    | n.a.  |
| 40        | training set | 1   | 1          | 0    | n.a.  |
| 41        | training set | 0   | 0          | 0    | n.a.  |
| 42        | training set | 0   | 0          | 0    | n.a.  |
| 43        | training set | 1   | 0          | 0    | n.a.  |
| 44        | training set | 1   | 1          | 0    | n.a.  |
| 45        | training set | 0   | 0          | 0    | n.a.  |
| 46        | training set | 0   | 0          | 0    | n.a.  |
| 47        | training set | 0   | 0          | 0    | 0     |
| 48        | training set | 1   | 1          | 1    | 0     |
| 49        | training set | 1   | 0          | 0    | 1     |
| 50        | training set | 1   | 0          | 0    | 0     |
| 51        | training set | 1   | 0          | 1    | 1     |

|          |               |   |   |   |      |
|----------|---------------|---|---|---|------|
| 52       | training set  | 0 | 0 | 0 | 0    |
| 53       | training set  | 1 | 0 | 0 | 0    |
| 54       | training set  | 0 | 0 | 0 | 1    |
| 55       | training set  | 0 | 0 | 0 | 0    |
| 56       | training set  | 0 | 0 | 0 | 0    |
| 57       | training set  | 0 | 0 | 0 | 0    |
| 58       | training set  | 1 | 0 | 0 | 0    |
| 59       | training set  | 1 | 1 | 0 | 0    |
| 60       | training set  | 0 | 0 | 0 | n.a. |
| 61       | training set  | 1 | 1 | 1 | n.a. |
| 62       | training set  | 0 | 0 | 0 | n.a. |
| 63       | training set  | 1 | 0 | 0 | n.a. |
| 64       | training set  | 1 | 0 | 0 | n.a. |
| 65       | training set  | 1 | 0 | 0 | n.a. |
| 66       | training set  | 1 | 1 | 0 | n.a. |
| 67       | training set  | 1 | 1 | 0 | n.a. |
| 68       | training set  | 1 | 1 | 0 | n.a. |
| 69       | training set  | 1 | 1 | 0 | n.a. |
| 70       | training set  | 1 | 1 | 0 | n.a. |
| 71       | training set  | 1 | 0 | 0 | n.a. |
| 72       | training set  | 0 | 1 | 1 | n.a. |
| 73       | training set  | 1 | 0 | 0 | n.a. |
| 74       | training set  | 1 | 0 | 0 | n.a. |
| 75       | training set  | 0 | 0 | 0 | n.a. |
| 76       | training set  | 0 | 1 | 0 | n.a. |
| 77       | training set  | 1 | 0 | 0 | n.a. |
| 78       | training set  | 1 | 0 | 0 | 0    |
| 79       | training set  | 0 | 0 | 0 | 0    |
| 80       | training set  | 0 | 0 | 0 | 0    |
| 81       | training set  | 0 | 0 | 1 | n.a. |
| 82       | training set  | 1 | 1 | 0 | 1    |
| 83       | training set  | 0 | 0 | 0 | 0    |
| 84       | training set  | 0 | 0 | 0 | n.a. |
| 85       | training set  | 1 | 0 | 0 | n.a. |
| 86       | training set  | 0 | 0 | 1 | n.a. |
| 87       | training set  | 0 | 0 | 0 | n.a. |
| 88       | training set  | 0 | 0 | 0 | n.a. |
| 89       | training set  | 1 | 1 | 0 | n.a. |
| 90       | training set  | 1 | 0 | 1 | n.a. |
| 91       | training set  | 1 | 1 | 0 | n.a. |
| 92       | training set  | 1 | 1 | 0 | n.a. |
| 93       | training set  | 0 | 0 | 0 | n.a. |
| 94       | training set  | 0 | 0 | 0 | n.a. |
| 95       | training set  | 0 | 0 | 0 | n.a. |
| 96       | training set  | 1 | 1 | 1 | n.a. |
| Set 1.1  | testing Set 1 | 1 | 1 | 0 | 1    |
| Set 1.2  | testing Set 1 | 1 | 0 | 0 | 0    |
| Set 1.3  | testing Set 1 | 0 | 1 | 0 | 0    |
| Set 1.4  | testing Set 1 | 0 | 0 | 0 | 0    |
| Set 1.5  | testing Set 1 | 0 | 0 | 0 | 0    |
| Set 1.6  | testing Set 1 | 0 | 0 | 0 | 0    |
| Set 1.7  | testing Set 1 | 0 | 1 | 0 | 0    |
| Set 1.8  | testing Set 1 | 0 | 0 | 0 | 0    |
| Set 1.9  | testing Set 1 | 1 | 1 | 0 | 0    |
| Set 1.10 | testing Set 1 | 1 | 1 | 0 | 0    |
| Set 1.11 | testing Set 1 | 0 | 1 | 1 | 0    |
| Set 1.12 | testing Set 1 | 1 | 0 | 0 | 0    |
| Set 1.13 | testing Set 1 | 0 | 0 | 0 | 0    |



|          |               |   |   |   |   |
|----------|---------------|---|---|---|---|
| Set 1.14 | testing Set 1 | 1 | 1 | 0 | 0 |
| Set 1.15 | testing Set 1 | 1 | 1 | 1 | 1 |
| Set 1.16 | testing Set 1 | 0 | 1 | 0 | 0 |
| Set 1.17 | testing Set 1 | 0 | 0 | 0 | 0 |
| Set 1.18 | testing Set 1 | 0 | 0 | 0 | 0 |
| Set 1.19 | testing Set 1 | 1 | 0 | 0 | 0 |
| Set 1.20 | testing Set 1 | 0 | 1 | 0 | 0 |
| Set 1.21 | testing Set 1 | 0 | 1 | 0 | 0 |
| Set 1.22 | testing Set 1 | 1 | 1 | 1 | 0 |
| Set 1.23 | testing Set 1 | 0 | 0 | 0 | 0 |
| Set 1.24 | testing Set 1 | 1 | 1 | 1 | 1 |
| Set 1.25 | testing Set 1 | 1 | 1 | 0 | 0 |
| Set 1.26 | testing Set 1 | 0 | 0 | 0 | 0 |
| Set 1.27 | testing Set 1 | 0 | 0 | 0 | 0 |
| Set 1.28 | testing Set 1 | 1 | 1 | 0 | 1 |
| Set 1.29 | testing Set 1 | 1 | 1 | 0 | 0 |
| Set 1.30 | testing Set 1 | 0 | 0 | 0 | 0 |
| Set 1.31 | testing Set 1 | 0 | 0 | 0 | 0 |
| Set 1.32 | testing Set 1 | 0 | 0 | 0 | 0 |
| Set 1.33 | testing Set 1 | 0 | 0 | 1 | 1 |
| Set 1.34 | testing Set 1 | 0 | 0 | 0 | 0 |
| Set 1.35 | testing Set 1 | 1 | 0 | 0 | 0 |
| Set 1.36 | testing Set 1 | 1 | 1 | 0 | 1 |
| Set 1.37 | testing Set 1 | 0 | 0 | 0 | 1 |
| Set 1.38 | testing Set 1 | 0 | 0 | 0 | 0 |
| Set 1.39 | testing Set 1 | 0 | 0 | 0 | 0 |
| Set 1.40 | testing Set 1 | 0 | 0 | 0 | 0 |
| Set 1.41 | testing Set 1 | 0 | 0 | 0 | 0 |
| Set 1.42 | testing Set 1 | 0 | 0 | 0 | 0 |
| Set 1.43 | testing Set 1 | 1 | 1 | 0 | 0 |
| Set 1.44 | testing Set 1 | 0 | 0 | 0 | 0 |
| Set 1.45 | testing Set 1 | 0 | 0 | 1 | 1 |
| Set 1.46 | testing Set 1 | 0 | 0 | 1 | 1 |
| Set 1.47 | testing Set 1 | 0 | 0 | 0 | 0 |
| Set 1.48 | testing Set 1 | 0 | 0 | 0 | 0 |
| Set 1.49 | testing Set 1 | 1 | 0 | 0 | 0 |
| Set 1.50 | testing Set 1 | 1 | 1 | 0 | 1 |
| Set 1.51 | testing Set 1 | 0 | 0 | 0 | 0 |
| Set 1.52 | testing Set 1 | 0 | 0 | 0 | 0 |
| Set 1.53 | testing Set 1 | 0 | 1 | 0 | 0 |
| Set 1.54 | testing Set 1 | 0 | 0 | 0 | 0 |
| Set 1.55 | testing Set 1 | 0 | 0 | 0 | 0 |
| Set 1.56 | testing Set 1 | 1 | 1 | 0 | 0 |
| Set 1.57 | testing Set 1 | 1 | 1 | 0 | 1 |
| Set 1.58 | testing Set 1 | 0 | 0 | 0 | 0 |
| Set 1.59 | testing Set 1 | 0 | 1 | 0 | 0 |
| Set 1.60 | testing Set 1 | 0 | 0 | 0 | 0 |
| Set 1.61 | testing Set 1 | 1 | 1 | 0 | 0 |
| Set 1.62 | testing Set 1 | 1 | 1 | 0 | 0 |
| Set 1.63 | testing Set 1 | 1 | 1 | 0 | 1 |
| Set 1.64 | testing Set 1 | 0 | 0 | 0 | 0 |
| Set 1.65 | testing Set 1 | 1 | 0 | 0 | 1 |
| Set 1.66 | testing Set 1 | 0 | 1 | 1 | 1 |
| Set 1.67 | testing Set 1 | 1 | 1 | 0 | 0 |
| Set 1.68 | testing Set 1 | 1 | 1 | 1 | 1 |
| Set 1.69 | testing Set 1 | 0 | 0 | 1 | 1 |
| Set 1.70 | testing Set 1 | 0 | 0 | 0 | 0 |
| Set 1.71 | testing Set 1 | 1 | 1 | 1 | 1 |

|           |               |   |   |    |      |
|-----------|---------------|---|---|----|------|
| Set 1.72  | testing Set 1 | 0 | 0 | 0  | 0    |
| Set 1.73  | testing Set 1 | 1 | 1 | 1  | 1    |
| Set 1.74  | testing Set 1 | 0 | 1 | 0  | 0    |
| Set 1.75  | testing Set 1 | 1 | 1 | 1  | 1    |
| Set 1.76  | testing Set 1 | 1 | 1 | 1  | n.a. |
| Set 1.77  | testing Set 1 | 0 | 0 | 0  | 0    |
| Set 1.78  | testing Set 1 | 0 | 0 | 0  | 0    |
| Set 1.79  | testing Set 1 | 1 | 0 | 1  | 1    |
| Set 1.80  | testing Set 1 | 0 | 0 | 0  | 0    |
| Set 1.81  | testing Set 1 | 1 | 0 | 0  | 0    |
| Set 1.82  | testing Set 1 | 1 | 1 | 1  | 1    |
| Set 1.83  | testing Set 1 | 1 | 0 | 0  | 0    |
| Set 1.84  | testing Set 1 | 0 | 0 | 0  | 0    |
| Set 1.85  | testing Set 1 | 0 | 0 | 0  | 0    |
| Set 1.86  | testing Set 1 | 1 | 1 | 0  | 0    |
| Set 1.87  | testing Set 1 | 1 | 1 | 0  | 0    |
| Set 1.88  | testing Set 1 | 0 | 0 | 0  | 0    |
| Set 1.89  | testing Set 1 | 0 | 0 | 0  | 0    |
| Set 1.90  | testing Set 1 | 1 | 1 | 0  | 0    |
| Set 1.91  | testing Set 1 | 1 | 1 | 1  | 1    |
| Set 1.92  | testing Set 1 | 0 | 0 | 0  | 0    |
| Set 1.93  | testing Set 1 | 1 | 1 | 10 | 1    |
| Set 1.94  | testing Set 1 | 0 | 1 | 0  | 0    |
| Set 1.95  | testing Set 1 | 0 | 0 | 0  | 0    |
| Set 1.96  | testing Set 1 | 0 | 0 | 0  | 0    |
| Set 1.97  | testing Set 1 | 0 | 0 | 0  | 0    |
| Set 1.98  | testing Set 1 | 0 | 0 | 0  | 0    |
| Set 1.99  | testing Set 1 | 0 | 0 | 0  | 0    |
| Set 1.100 | testing Set 1 | 1 | 1 | 0  | 0    |
| Set 1.101 | testing Set 1 | 0 | 0 | 0  | 0    |
| Set 1.102 | testing Set 1 | 0 | 0 | 0  | 0    |
| Set 1.103 | testing Set 1 | 1 | 0 | 1  | 1    |
| Set 1.104 | testing Set 1 | 0 | 0 | 0  | 0    |
| Set 1.105 | testing Set 1 | 0 | 0 | 0  | 0    |
| Set 1.106 | testing Set 1 | 1 | 1 | 0  | 0    |
| Set 1.107 | testing Set 1 | 0 | 1 | 1  | 1    |
| Set 1.108 | testing Set 1 | 0 | 0 | 0  | 0    |
| Set 1.109 | testing Set 1 | 1 | 1 | 0  | 1    |
| Set 1.110 | testing Set 1 | 0 | 0 | 0  | 1    |
| Set 1.111 | testing Set 1 | 0 | 0 | 0  | 0    |
| Set 1.112 | testing Set 1 | 0 | 1 | 0  | 0    |
| Set 1.113 | testing Set 1 | 1 | 1 | 0  | 0    |
| Set 1.114 | testing Set 1 | 0 | 0 | 0  | 0    |
| Set 1.115 | testing Set 1 | 1 | 1 | 0  | 1    |
| Set 1.116 | testing Set 1 | 1 | 1 | 1  | 1    |
| Set 1.117 | testing Set 1 | 0 | 0 | 0  | 0    |
| Set 1.118 | testing Set 1 | 0 | 1 | 1  | 1    |
| Set 1.119 | testing Set 1 | 0 | 1 | 1  | 1    |
| Set 1.120 | testing Set 1 | 1 | 1 | 1  | 1    |

**RT-PCR.**

test the Y36 model. Testing Set 1 of 120 NB samples.

amplified, 1= amplified; 1p LOH status: 0= normal, 1= LOH; Event: 0= no event, 1= event; Survival St

| Event | EFS    | Survival Status | Follow up |
|-------|--------|-----------------|-----------|
| 0     | 47.41  | 1               | 47.41     |
| 1     | 8.75   | 0               | 24.85     |
| 0     | 47.41  | 1               | 47.41     |
| 1     | 29.93  | 0               | 45.67     |
| 0     | 30.46  | 1               | 30.46     |
| 1     | 28.46  | 1               | 28.46     |
| 0     | 28.46  | 1               | 28.46     |
| 0     | 27.44  | 1               | 27.44     |
| 1     | 5.08   | 0               | 8.46      |
| 1     | 12.52  | 0               | 21.51     |
| 0     | 21.51  | 1               | 21.51     |
| 0     | 20.49  | 1               | 20.49     |
| 1     | 2.39   | 0               | 8.36      |
| 1     | 1.97   | 0               | 5.38      |
| 0     | 167.88 | 1               | 167.88    |
| 1     | 18.00  | 0               | 24.05     |
| 1     | 3.69   | 0               | 10.82     |
| 0     | 212.02 | 1               | 212.02    |
| 1     | 8.07   | 1               | 143.40    |
| 1     | 11.30  | 0               | 12.24     |
| 1     | 11.42  | 0               | 41.47     |
| 0     | 126.13 | 1               | 126.13    |
| 1     | 31.91  | 0               | 51.58     |
| 0     | 81.66  | 1               | 81.66     |
| 0     | 89.52  | 1               | 89.52     |
| 1     | 9.10   | 1               | 149.09    |
| 0     | 110.44 | 1               | 110.44    |
| 0     | 176.99 | 1               | 176.99    |
| 0     | 205.80 | 1               | 205.80    |
| 0     | 187.91 | 1               | 187.91    |
| 0     | 123.70 | 1               | 123.70    |
| 0     | 78.92  | 1               | 78.92     |
| 0     | 72.00  | 1               | 72.00     |
| 1     | 9.31   | 0               | 20.62     |
| 1     | 10.46  | 0               | 10.46     |
| 1     | 25.25  | 1               | 55.54     |
| 1     | 49.41  | 1               | 49.41     |
| 0     | 15.40  | 1               | 15.40     |
| 0     | 27.10  | 1               | 27.10     |
| 0     | 25.70  | 1               | 25.70     |
| 0     | 24.10  | 1               | 24.10     |
| 0     | 23.50  | 1               | 23.50     |
| 0     | 23.50  | 1               | 23.50     |
| 1     | 2.52   | 1               | 20.26     |
| 0     | 19.26  | 1               | 19.26     |
| 0     | 18.83  | 1               | 18.83     |
| 1     | 1.70   | 1               | 141.10    |
| 0     | 125.34 | 1               | 125.34    |
| 0     | 132.84 | 1               | 132.84    |
| 1     | 5.30   | 1               | 145.90    |
| 1     | 6.54   | 0               | 19.54     |

|   |        |   |        |
|---|--------|---|--------|
| 0 | 95.05  | 1 | 95.05  |
| 0 | 170.34 | 1 | 170.34 |
| 0 | 155.80 | 1 | 155.80 |
| 1 | 39.20  | 1 | 230.24 |
| 0 | 127.51 | 1 | 127.51 |
| 1 | 0.40   | 1 | 249.06 |
| 0 | 125.93 | 1 | 125.93 |
| 0 | 125.70 | 1 | 125.70 |
| 0 | 114.20 | 1 | 114.20 |
| 1 | 10.26  | 0 | 88.92  |
| 0 | 75.25  | 1 | 75.25  |
| 0 | 41.64  | 1 | 41.64  |
| 0 | 133.68 | 1 | 133.68 |
| 0 | 108.59 | 1 | 108.59 |
| 1 | 14.77  | 0 | 72.66  |
| 1 | 12.50  | 0 | 33.52  |
| 0 | 91.68  | 1 | 91.68  |
| 1 | 48.36  | 1 | 74.14  |
| 0 | 67.86  | 1 | 67.86  |
| 0 | 38.88  | 1 | 38.88  |
| 0 | 113.19 | 1 | 113.19 |
| 0 | 104.44 | 1 | 104.44 |
| 0 | 79.61  | 1 | 79.61  |
| 0 | 59.84  | 1 | 59.84  |
| 0 | 47.60  | 1 | 47.60  |
| 0 | 142.70 | 1 | 142.70 |
| 0 | 82.13  | 1 | 82.13  |
| 1 | 4.00   | 1 | 61.83  |
| 0 | 52.73  | 1 | 52.73  |
| 0 | 48.83  | 1 | 48.83  |
| 0 | 45.60  | 1 | 45.60  |
| 0 | 40.97  | 1 | 40.97  |
| 0 | 12.07  | 1 | 12.07  |
| 0 | 12.33  | 1 | 12.33  |
| 0 | 12.00  | 1 | 12.00  |
| 0 | 16.80  | 1 | 16.80  |
| 0 | 15.17  | 1 | 15.17  |
| 1 | 15.00  | 1 | 22.00  |
| 1 | 5.50   | 1 | 12.00  |
| 1 | 13.00  | 0 | 14.00  |
| 1 | 6.00   | 1 | 17.00  |
| 0 | 16.00  | 1 | 16.00  |
| 0 | 14.00  | 1 | 14.00  |
| 0 | 64.00  | 1 | 64.00  |
| 1 | 7.00   | 0 | 12.00  |
| 1 | 17.73  | 1 | 20.87  |
| 0 | 167.03 | 0 | 167.03 |
| 0 | 157.53 | 0 | 157.53 |
| 0 | 171.57 | 0 | 171.57 |
| 0 | 105.43 | 0 | 105.43 |
| 0 | 70.03  | 0 | 70.03  |
| 0 | 169.87 | 0 | 169.87 |
| 0 | 110.40 | 0 | 110.40 |
| 1 | 30.73  | 1 | 41.57  |
| 0 | 144.67 | 0 | 144.67 |
| 0 | 156.07 | 0 | 156.07 |
| 0 | 136.87 | 0 | 136.87 |
| 0 | 163.93 | 0 | 163.93 |

|   |        |   |        |
|---|--------|---|--------|
| 1 | 27.93  | 1 | 51.63  |
| 1 | 20.90  | 1 | 28.53  |
| 0 | 147.90 | 0 | 147.90 |
| 1 | 13.30  | 1 | 13.97  |
| 0 | 126.90 | 0 | 126.90 |
| 0 | 64.13  | 0 | 64.13  |
| 0 | 100.37 | 0 | 100.37 |
| 0 | 117.87 | 0 | 117.87 |
| 1 | 1.07   | 1 | 5.57   |
| 0 | 193.77 | 0 | 193.77 |
| 0 | 136.33 | 0 | 136.33 |
| 1 | 18.50  | 1 | 25.43  |
| 1 | 3.27   | 0 | 147.00 |
| 0 | 141.33 | 0 | 141.33 |
| 1 | 11.90  | 1 | 15.97  |
| 1 | 16.57  | 1 | 48.17  |
| 0 | 131.90 | 0 | 131.90 |
| 0 | 149.33 | 0 | 149.33 |
| 0 | 104.97 | 0 | 104.97 |
| 1 | 20.67  | 1 | 36.03  |
| 0 | 122.57 | 0 | 122.57 |
| 0 | 145.50 | 0 | 145.50 |
| 0 | 150.27 | 0 | 150.27 |
| 0 | 119.17 | 0 | 119.17 |
| 0 | 59.97  | 0 | 59.97  |
| 0 | 148.00 | 0 | 148.00 |
| 0 | 135.03 | 0 | 135.03 |
| 1 | 9.53   | 0 | 76.00  |
| 0 | 117.93 | 0 | 117.93 |
| 1 | 27.07  | 1 | 48.47  |
| 0 | 115.03 | 0 | 115.03 |
| 1 | 3.73   | 0 | 109.43 |
| 0 | 76.87  | 0 | 76.87  |
| 0 | 139.83 | 0 | 139.83 |
| 1 | 9.77   | 0 | 93.57  |
| 0 | 106.53 | 0 | 106.53 |
| 1 | 67.20  | 1 | 94.53  |
| 0 | 89.33  | 0 | 89.33  |
| 0 | 130.03 | 0 | 130.03 |
| 0 | 0.30   | 1 | 0.30   |
| 0 | 128.97 | 0 | 128.97 |
| 0 | 110.93 | 0 | 110.93 |
| 1 | 23.50  | 1 | 126.97 |
| 1 | 32.33  | 1 | 46.70  |
| 0 | 97.77  | 0 | 97.77  |
| 1 | 58.40  | 0 | 114.33 |
| 0 | 131.80 | 0 | 131.80 |
| 1 | 13.80  | 1 | 44.23  |
| 1 | 16.20  | 1 | 43.10  |
| 0 | 121.03 | 0 | 121.03 |
| 0 | 119.03 | 0 | 119.03 |
| 1 | 1.87   | 1 | 17.40  |
| 1 | 10.87  | 1 | 13.03  |
| 0 | 123.93 | 0 | 123.93 |
| 1 | 6.70   | 1 | 6.90   |
| 0 | 90.80  | 0 | 90.80  |
| 0 | 44.33  | 0 | 44.33  |
| 1 | 17.27  | 1 | 20.07  |

|   |        |   |        |
|---|--------|---|--------|
| 0 | 119.03 | 0 | 119.03 |
| 1 | 28.00  | 1 | 39.70  |
| 0 | 119.20 | 0 | 119.20 |
| 1 | 10.17  | 1 | 12.50  |
| 0 | 1.17   | 1 | 1.17   |
| 0 | 114.27 | 0 | 114.27 |
| 0 | 72.23  | 0 | 72.23  |
| 0 | 117.53 | 0 | 117.53 |
| 0 | 106.93 | 0 | 106.93 |
| 1 | 22.83  | 0 | 121.27 |
| 1 | 39.90  | 1 | 56.50  |
| 0 | 116.23 | 0 | 116.23 |
| 0 | 109.17 | 0 | 109.17 |
| 0 | 108.17 | 0 | 108.17 |
| 0 | 104.47 | 0 | 104.47 |
| 1 | 49.33  | 0 | 117.63 |
| 0 | 100.43 | 0 | 100.43 |
| 0 | 86.13  | 0 | 86.13  |
| 1 | 19.77  | 1 | 45.40  |
| 0 | 105.37 | 0 | 105.37 |
| 0 | 105.40 | 0 | 105.40 |
| 1 | 31.53  | 1 | 45.83  |
| 1 | 46.63  | 0 | 114.00 |
| 0 | 110.80 | 0 | 110.80 |
| 1 | 37.60  | 0 | 111.00 |
| 0 | 89.50  | 0 | 89.50  |
| 0 | 97.30  | 0 | 97.30  |
| 0 | 73.90  | 0 | 73.90  |
| 0 | 98.70  | 0 | 98.70  |
| 0 | 34.90  | 0 | 34.90  |
| 0 | 50.60  | 0 | 50.60  |
| 0 | 121.03 | 0 | 121.03 |
| 0 | 81.03  | 0 | 81.03  |
| 1 | 1.80   | 0 | 94.97  |
| 1 | 21.03  | 1 | 46.57  |
| 1 | 16.07  | 1 | 29.63  |
| 1 | 31.07  | 0 | 57.27  |
| 1 | 14.03  | 1 | 21.27  |
| 0 | 85.07  | 0 | 85.07  |
| 1 | 9.87   | 0 | 92.37  |
| 0 | 93.60  | 0 | 93.60  |
| 1 | 21.50  | 1 | 29.97  |
| 0 | 53.40  | 0 | 53.40  |
| 0 | 92.27  | 0 | 92.27  |
| 1 | 14.77  | 1 | 26.13  |
| 0 | 86.27  | 0 | 86.27  |
| 1 | 14.43  | 1 | 23.70  |
| 1 | 7.07   | 1 | 7.33   |
| 0 | 75.83  | 0 | 75.83  |

tatus: 0=alive, 1= dead; n.a.= non available
